# 1 **The Initiation Knot is a Signaling Center Required for Molar Tooth**

## 2 **Development**

3

4 Isabel Mogollón<sup>1</sup>, Jacqueline E. Moustakas-Verho<sup>1,2</sup>, Minna Niittykoski<sup>1</sup>, Laura Ahtiainen<sup>1\*</sup>

5 <sup>1</sup> Cell and Tissue Dynamics Research Program, Institute of Biotechnology, University of Helsinki

6 Finland

7 <sup>2</sup> Organismal & Evolutionary Biology Research Program, University of Helsinki Finland

8 Corresponding author L.A.

9 Cell and Tissue Dynamics Research Program, Institute of Biotechnology/Helsinki Institute of Life

10 Science, P.O. Box 56 (Viikinkaari 5), FIN-00014 University of Helsinki, Finland.

11 Tel: +358 50 4489338

12 Email: [laura.ahtiainen@helsinki.fi](mailto:laura.ahtiainen@helsinki.fi)

13

## 14 **Summary**

15 Signaling centers, or organizers, regulate many aspects of embryonic morphogenesis. In the  
16 mammalian molar tooth, reiterative signaling in specialized centers called enamel knots (EKs)  
17 determine tooth patterning. Preceding the first, primary EK, a transient epithelial thickening appears  
18 whose significance remains debated. Here, using tissue confocal fluorescence imaging with laser  
19 ablation experiments, we show that this transient thickening is an earlier signaling center, the molar  
20 initiation knot (IK) that is required for the progression of tooth development. IK cell dynamics  
21 manifest the hallmarks of a signaling center; cell cycle exit, condensation, and eventual silencing  
22 through apoptosis. IK initiation and maturation are defined by the juxtaposition of high Wnt activity  
23 cells to *Shh*-expressing non-proliferating cells, the combination of which drives the growth of the  
24 tooth bud, leading to the formation of the primary EK as an independent cell cluster. Overall, the  
25 whole development of the tooth, from initiation to patterning, is driven by the iterative use of signaling  
26 centers.

27

28 **Keywords:** cell division, migration, embryonic development, tooth, signaling center, Wnt, Shh

## 29 **Introduction**

30 In recent years, advances in 3D and live tissue imaging have brought new understanding of the cell  
31 level behaviors that contribute to the highly dynamic stages of morphogenesis in ectodermal organs,  
32 such as hair and teeth (Kim, et al., 2017; Ahtiainen, et al., 2016; Ahtiainen, et al., 2014; Devenport  
33 and Fuchs, 2008). Despite shared morphological characteristics and conserved signaling (Biggs and  
34 Mikkola, 2014; Jernvall and Thesleff, 2000), it is becoming evident that signaling cues are interpreted  
35 into diverse cellular behaviors depending on the context, thereby defining different organ shapes and  
36 sizes already at early stages of organogenesis. Morphogenesis in ectodermal organs is regulated by  
37 epithelial signaling centers that form sequentially in specific spatiotemporal patterns and govern cell  
38 behaviors via secreted factors including hedgehog (Hh), Wnt, fibroblast growth factor (Fgf) and bone  
39 morphogenic protein (Bmp) family members (Jernvall and Thesleff, 2000; Dassule and McMahon,  
40 1998).

41 Teeth have long served as a model organ to study mechanisms of embryonic development in tissue  
42 interactions and genetic regulation (Jernvall and Thesleff, 2000). Mice have two tooth types: large  
43 ever-growing incisors and multicuspid molars. Organogenesis in teeth is initiated at embryonic day  
44 (E)11 with an epithelial thickening called the dental lamina. It resolves into separate domains for  
45 incisor and first molar primordia, with a toothless diastema in between. The instructive potential  
46 resides initially in the epithelium and shifts to the mesenchyme at the bud stage. Epithelial budding  
47 starts at E12.5 followed by mesenchymal condensation leading to a mature bud at E13.5 (Jernvall and  
48 Thesleff, 2000). The molar primary enamel knot (pEK) signaling center appears at E13.5 in the late  
49 bud stage epithelium and matures into the enamel organ in the cap stage at E14.5 (Tummers and  
50 Thesleff, 2009). The pEK is silenced by apoptosis and sequentially followed by pairs of secondary  
51 enamel knots (sEK) that regulate cusp patterning (Jernvall, et al., 1994). Fate mapping studies have  
52 shown that the pEK clonally contributes to the buccal sEK, but may not contribute to the lingual  
53 counterpart (Du, et al., 2017).

54 The cellular events in early molar morphogenesis have remained largely uncharted, as emphasis has  
55 been on the bud stage and beyond. Recently, we identified a novel epithelial signaling center in the  
56 early developing incisor, called the initiation knot (IK), which drives local cell proliferation for  
57 epithelial budding (Ahtiainen, et al., 2016). The incisor IK shares transcriptional signatures with the  
58 incisor enamel knot (EK), which forms without clonal contribution from the IK (Du, et al., 2017;  
59 Ahtiainen, et al., 2016; Li, et al., 2016a). While the molar placode and EKs are known to share  
60 molecular markers, a similar signaling center in the molar as in the incisor has not been reported.  
61 However, previous studies using expression and histological analyses of molar morphogenesis prior  
62 to budding, have interpreted a transient epithelial thickening in the diastema anterior to the first  
63 developing molar as evidence for the presence of vestigial premolar teeth lost during murine evolution  
64 (Prochazka, et al., 2010).

65 To resolve the early events of molar morphogenesis, we use confocal fluorescence whole-mount live  
66 tissue imaging to elucidate the cellular and molecular dynamics of signaling centers and how they  
67 shape the tooth bud. We show that an IK signaling center is established in the molar placode and it  
68 remains an integral functional part of the developing bud. The molar IK arises by the juxtaposition of  
69 cells with high canonical Wnt activity to *Shh*-expressing G<sub>1</sub>/G<sub>0</sub>-phase cells. Molar early growth is  
70 dependent on the IK signaling center and interference of the function of this signaling center either  
71 mechanically, by laser ablation, or with specific modulators of relevant signaling pathways, abrogates  
72 bud proliferative growth and progression of tooth development. The IK positions the tooth in the  
73 growing mandible and is silenced by apoptosis as the pEK arises independently to drive further  
74 growth of the bud. The cellular and molecular dynamics of the IK signaling center control tooth  
75 development earlier than previously thought.

## 76 **Results**

### 77 **A molar initiation knot is established in the placode and early bud in G<sub>1</sub>/G<sub>0</sub> cells expressing** 78 **signaling center markers**

79 Cell cycle exit is an early hallmark of ectodermal placodes (Ahtiainen, et al., 2016; Ahtiainen, et al.,  
80 2014). The Fucci fluorescent cell cycle reporter system allows direct real-time follow-up of the  
81 progress of the cell cycle in individual cells in the developing tissue: When the cell is in G<sub>1</sub>/G<sub>0</sub> phase  
82 the nucleus emits red fluorescence and upon transition to S/G<sub>2</sub>/M proliferative phase, the cell nucleus  
83 emits green fluorescence. We used confocal fluorescence microscopy of whole-mount mandibles of  
84 the Fucci cell cycle indicator transgenic mouse to characterize G<sub>1</sub>/G<sub>0</sub> cell distribution in the  
85 developing molar. Transgenic Shh<sup>GFP/+</sup> (Harfe, et al., 2004) and Fgf20<sup>βGal/+</sup> expression were used to  
86 identify signaling centers from E11.5-E13.5 and EpCam immunofluorescence staining to visualize  
87 the epithelium.

88 At E11.5, G<sub>1</sub>/G<sub>0</sub> phase cells were distributed throughout the dental lamina (Fig.1A). By E12.5 the  
89 G<sub>1</sub>/G<sub>0</sub> cells were located mesially in the mature placode/early bud. At 13.0, the G<sub>1</sub>/G<sub>0</sub> focus remained  
90 in the mesio-lingual part of the bud, close to epithelial surface and a new focus of G<sub>1</sub>/G<sub>0</sub> cells appeared  
91 distally deep in the invaginating bud, in the presumptive pEK area. By E13.5, the early G<sub>1</sub>/G<sub>0</sub> focus  
92 was lost with only a few cells remaining (Fig.1A). Quantification of G<sub>1</sub>/G<sub>0</sub> cells in different stages  
93 showed a decrease in the G<sub>1</sub>/G<sub>0</sub> cell number in the early focus from E12.5 to E13.5 (Fig.S1A). In  
94 parallel, G<sub>1</sub>/G<sub>0</sub> cells corresponding to the pEK area emerged. For further functional analyses we  
95 verified that the budding morphogenesis and G<sub>1</sub>/G<sub>0</sub> cell distribution were similar in *ex vivo* cultured  
96 whole mount explants to *in vivo* (Fig.S1B). Numbers of G<sub>1</sub>/G<sub>0</sub> cells were also similar *in vivo* and in  
97 cultured tissue (Fig.S2C).

98 The Shh<sup>GFP</sup> and Fucci G<sub>1</sub>/G<sub>0</sub> reporters could not be combined as this often resulted in abnormal  
99 development of the craniofacial structures. However, the Shh<sup>GFP</sup> reporter showed expression in the

100 same areas as the  $G_1/G_0$  foci throughout morphogenesis (Fig.1B): GFP<sup>+</sup> cells were present throughout  
101 the placode at E11.5. At E12.5, they were located at the mesio-lingual side of the early bud close to  
102 the epithelial surface. By E13.5, GFP signal had disappeared almost completely in the early  $G_1/G_0$   
103 focus and appeared in the presumptive pEK area. DIG *in situ* hybridization with a probe specific for  
104 *Shh* in Fucci  $G_1/G_0$  reporter mandibles showed exact colocalization of *Shh* with the Fucci reporter  
105 (Fig.S1E). The numbers of Shh<sup>GFP+</sup> cells and Fucci  $G_1/G_0$  showed similar distribution in the  
106 developing molar (Fig.S1A,D). Immunofluorescence staining for  $\beta$ -galactosidase ( $\beta$ Gal), marking  
107 signaling centers in Fgf20 <sup>$\beta$ Gal/+</sup>;Fucci  $G_1/G_0$  embryos, showed colocalization of the markers from  
108 E11.5 in the early  $G_1/G_0$  focus and through early bud stage (E12.5-E13.0) and in the pEK at E13.5  
109 (Fig.1C).

110 Together these data confirmed the identity of the initial molar placode  $G_1/G_0$  focus and corresponding  
111 focus in the mesio-lingual part of the developing molar bud epithelium as a signaling center. This  
112 early signaling center appeared prior to the pEK and thus we call this signaling center a molar  
113 initiation knot (IK).

#### 114 **The molar IK is a functional signaling center driving the molar bud proliferative growth**

115 Next, we studied cell proliferation in the developing molar. In the incisor, budding occurs via cell  
116 proliferation regulated by non-proliferative signaling centers (Ahtiainen, et al., 2016), whereas cell  
117 rearrangements and migration together with Shh driven proliferation have been proposed as  
118 mechanisms for molar bud invagination (Li, et al., 2016b; Prochazka, et al., 2015; Dassule and  
119 McMahon, 1998). To dissect the IK contribution to the molar bud, we first studied cell proliferation  
120 with Fucci S/G<sub>2</sub>/M and  $G_1/G_0$  cell cycle indicators in fixed whole-mount mandibles. We then imaged  
121 whole-mount mandible explant cultures using live tissue confocal microscopy, which allowed us to  
122 follow the developing bud in a single-cell resolution.

123 Live tissue confocal microscopy of the Fucci  $G_1/G_0$  reporter, for visualization of the molar IK and  
124 pEK cells, and K17-GFP reporter to follow the shape of the epithelial bud from E12.5+16h, confirmed  
125 that the IK cells stay an integral part of the developing bud (Fig.2A, Fig.S2A). Observing proliferation  
126 patterns with the Fucci reporters showed that during early initiation, at E11.5,  $G_1/G_0$  cells comprised  
127 the placode and S/ $G_2/M$  cells were evenly distributed throughout the oral epithelium (Fig.2B,C). By  
128 E12.5, S/ $G_2/M$  cells appeared posterior to the IK in the maturing placode. From E12.5 to E12.75,  
129 there was a sharp increase in S/ $G_2/M$  cells throughout the bud epithelium, in both basal and suprabasal  
130 populations (Fig.2B,C). At E13.5, S/ $G_2/M$  cells were present in the bud and surrounding the pEK  
131 area. Few IK  $G_1/G_0$  cells still remained. Quantification of cell number showed very few proliferative  
132 cells in the placode at E11.5 (Fig.S2B). At E12.5, during the initiation of budding, there was a  
133 threefold increase in S/ $G_2/M$  cell number and further a twofold increase at E13.0 with similar cell  
134 numbers in *ex vivo* cultures (Fig.S2B). Proliferation was concurrent with bud elongation and  
135 invagination (Fig.S2C).

136 We next analyzed the contribution of individual cells in each cell population to the growing bud.  
137 Quantification of cell cycle phases with live imaging from E11.5+12h molars showed constant  $G_1/G_0$   
138 cell number in the placode (Fig.2D). A burst of cell proliferation from 4h onwards was seen in the  
139 emerging bud. This was specific to the tooth bud, as the contributions of  $G_1/G_0$  and S/ $G_2/M$  cells  
140 remained constant in the oral epithelium (Fig.2D, Fig.S2D). When we followed individual IK cells  
141 through the cell cycle from E11.5+12h, we observed some new  $G_1/G_0$  cells appearing in the IK while  
142 two cells showed nuclear fragmentation (Fig.S2E, Mov.S1). None of the followed  $G_1/G_0$  cells in the  
143 IK re-entered the cell cycle. Live imaging from the early bud stage onwards E12.0+12h, showed that  
144 more bud cells entered S/ $G_2/M$  (Fig.S2F, Mov.S2). There was a respective increase in cell divisions  
145 throughout the bud as the bud grew. When we followed individual proliferating cells, of the 126  
146 original S/ $G_2/M$  cells followed, 25% went through cytokinesis, and divisions were observed  
147 throughout the bud (Fig.S2F, Mov.S2). Some IK cells showed nuclear fragmentation and were lost,

148 while remaining IK cells stayed in G<sub>1</sub>/G<sub>0</sub>. Quantification of cell cycle phases from E12.5+12h showed  
149 that number of molar IK G<sub>1</sub>/G<sub>0</sub> cells decreased slightly (Fig.2E). The bud S/G<sub>2</sub>/M population  
150 continued to expand, leveling out after six hours. This coincided with the appearance of the first G<sub>1</sub>/G<sub>0</sub>  
151 cells contributing to the pEK. Also, at this stage, proliferation was specific to the tooth bud (Fig.S2D).  
152 Shh and Fgf signaling have been suggested to induce proliferation in tooth buds (Hardcastle et al.,  
153 1998, Cobourne et al., 2009); however, inhibition of Shh signaling at the placode stage was reported  
154 to produce a flat wide molar bud with negligible effect on proliferation (Prochazka et al., 2015, Li et  
155 al., 2016b). This discrepancy could be explained by different effects of the signaling pathway on  
156 different molar cell populations. To substantiate this, we treated E11.5 cultures with cyclopamine to  
157 inhibit Shh signaling. Inhibition reduced bud invagination (Fig.S3A,C). This was concomitant with a  
158 reduced number of proliferating cells with expansion of G<sub>1</sub>/G<sub>0</sub> phases adjacent to the IK. A few  
159 proliferating cells were still observed basally/peripherally (Fig.S3A,D). We next treated E11.5  
160 cultures with an FGFR inhibitor (SU5402) to examine the role of FGF signaling. Inhibition of FGF  
161 signaling induced cell cycle exit somewhat later especially in basal cells, and less reduction in  
162 invagination and proliferation compared to cyclopamine treatment (Fig.S3B-D).  
163 We, therefore, conclude that the molar IK is a functional signaling center that regulates proliferation  
164 in tooth bud invagination and growth. The molar bud is formed by localized cell proliferation, with  
165 the involvement of Shh and FGF signaling.

#### 166 **IK ablation arrests progression of tooth development**

167 To confirm that the IK drives molar bud growth and is necessary for progression of tooth  
168 development, we ablated the IK at different developmental stages by microsurgery and laser ablation.  
169 When the placode was microsurgically removed at E11.5 and the tissue cultured for 24h, no G<sub>1</sub>/G<sub>0</sub>  
170 condensate was observed in the diastema and the epithelium remained flat (Fig.S4A,C).



171 Microsurgical removal of the IK at E12.5 similarly arrested tooth growth, while development on the  
172 untreated side proceeded to bud stage with the emerging pEK present (Fig.S4B,C).

173 For a more targeted approach we next removed the IK  $G_1/G_0$  cells at E11.5, E12.5 and E12.75 with  
174 laser ablation, followed by 24h culture, in K17-GFP and Fucci whole mount mandibles. Laser  
175 ablation of the IK  $G_1/G_0$  cells in the early placode stage (E11.5) epithelium abrogated epithelial  
176 invagination and tooth development, while development in the control progressed normally  
177 (Fig.3A,C). Ablation at early bud stage E12.5 similarly completely arrested bud invagination and  
178 elongation and inhibited progression of tooth development (Fig.3B,C). Ablation somewhat later at  
179 E12.75 at a more developed bud stage also arrested growth; however, a small cluster of  $G_1/G_0$  cells  
180 was observed in the bottom of bud facing the mesenchyme in the area where the pEK would emerge  
181 (Fig.3D). To observe if the arrested growth resulted from abrogated proliferation, we laser ablated  
182 the IK in the Fucci model. Correspondingly, ablation at E11.5 arrested invagination (Fig.3E) and this  
183 was accompanied with a loss in cell proliferation in the bud (Fig.3E,F). The persistence of S/ $G_2$ /M  
184 cells in the adjacent oral epithelium confirmed good tissue health in non-ablated tissue (Fig.3E). Cell  
185 proliferation and consequently bud growth were similarly abrogated in E12.5 ablated molars  
186 (Fig.3G,H).

187 These experiments demonstrate that the molar IK is a functional signaling center that drives cell  
188 proliferation, thereby regulating tooth bud growth. The IK is, therefore, necessary for the progression  
189 of tooth development.

190 **The IK remains an integral part of the developing molar and does not contribute cells to the**  
191 **pEK**

192 We next used whole-mount live tissue imaging to track individual cell movement in the different cell  
193 populations in placode and bud stage to dissect whether dynamical cell rearrangements contribute to  
194 molar bud formation. Signaling centers show canonical Wnt activity and we used the TCF/Lef:H2B-

195 GFP reporter to visualize Wnt active cells together with the Fucci G<sub>1</sub>/G<sub>0</sub> reporter to track signaling  
196 center cells. We further imaged the Fucci G<sub>1</sub>/G<sub>0</sub> reporter with the S/G<sub>2</sub>/M reporter to follow the  
197 proliferating bud cell population.

198 Initially at E11.5, G<sub>1</sub>/G<sub>0</sub> cells were distributed throughout the molar placode (Fig.4A,B,Mov.S3),  
199 similarly as observed in fixed samples (Fig.1A). More cells differentiated, entered G<sub>1</sub>/G<sub>0</sub> cell cycle  
200 phase, and were redistributed mesio-lingually in the maturing placode. Tracking of IK cells showed  
201 that they moved toward the mesial front area of the bud remaining an integral part of the bud. In  
202 contrast, bud S/G<sub>2</sub>/M cells stayed mostly in place (Fig.4B). At E11.5 Wnt activity was seen  
203 throughout the dental lamina visualized by high TCF/Lef:H2B-GFP reporter fluorescence intensity  
204 (Wnt<sup>Hi</sup>) (Fig.4C,Mov.S4). The molar placode IK G<sub>1</sub>/G<sub>0</sub> cells specifically localized to the peripheral  
205 border formed by dental lamina Wnt<sup>Hi</sup> cells. Some overlap of G<sub>1</sub>/G<sub>0</sub> and Wnt<sup>Hi</sup> signal was seen but  
206 the G<sub>1</sub>/G<sub>0</sub> cells mostly remained as a distinct subgroup (Fig.4C,D, Mov.S4). More G<sub>1</sub> cells were  
207 recruited to the IK and they showed directional movement toward the dental lamina Wnt<sup>Hi</sup> cells. The  
208 dental lamina Wnt<sup>Hi</sup> cells and bud TCF/Lef:H2B-GFP<sup>+</sup> cells remained non-motile  
209 (Fig.4C,D,Mov.S4).

210 Tracing cell movement in the molar IK and the emerging pEK from E12.5+12h showed that IK cells  
211 remained mesio-lingually close to the bud surface (Fig.4E,F,Mov.S5,Mov.S6). We did not detect  
212 contribution from either IK G<sub>1</sub>/G<sub>0</sub> cells or Wnt<sup>Hi</sup> to the pEK (Fig.4G,H,Mov.S6). The pEK arose deep  
213 in the bud, without clonal contribution from the IK (Fig.4G,H,Mov.S6). Also at this stage the S/G<sub>2</sub>/M  
214 cells showed little movement with no obvious orientation (Fig.4E,F,Mov.S5) and contribution of cells  
215 from oral epithelium, participating in bud growth, was not detected.

216 **Cell condensation and active directional cell migration drive molar IK maturation**

217 Our live imaging experiments showed that IK cells reorganize dynamically during placode/bud  
218 maturation. To define the significance of this to IK maturation we quantified IK cell condensation  
219 and analyzed if the movements involve active cell migration.

220 We first measured cell density in EpCam stained fixed whole-mount samples. Initially, at E11.5,  
221 G<sub>1</sub>/G<sub>0</sub> cells were more dispersed and at E12.5, they had condensed and retained this density until  
222 E13.5 (Fig.5A,B). Oral epithelial cells did not show a similar condensation. Quantification of cell  
223 density showed that condensation was specific to IK cells, with a significant increase in density from  
224 E11.5 to E12.5 compared to the oral epithelium (Fig.5B).

225 To study if IK condensation is achieved through active cell migration, we followed the movement of  
226 individual cells by live imaging at E11.5/E12.5+12h. Tracking showed active migration of the molar  
227 IK G<sub>1</sub>/G<sub>0</sub> cells at both time points. We quantified the overall track length and net displacement in the  
228 different cell populations, and at E11.5+12h, a significant difference in IK G<sub>1</sub>/G<sub>0</sub> cells was observed:  
229 They migrated more compared to both oral epithelial G<sub>1</sub>/G<sub>0</sub> and tooth bud S/G<sub>2</sub>/M cells (Fig.5C). At  
230 E12.5+12 h, IK G<sub>1</sub>/G<sub>0</sub> cells still showed a longer mean track length in the bud compared to S/G<sub>2</sub>/M  
231 cells (Fig.5C). Quantification of IK G<sub>1</sub>/G<sub>0</sub> cell displacement angles at E11.5+12h showed a distinct  
232 orientation towards the mesio-lingual side of the forming placode/bud, whereas oral epithelial cells  
233 showed a random orientation (Fig.5D). We confirmed active migration by following pairs of IK G<sub>1</sub>/G<sub>0</sub>  
234 and bud S/G<sub>2</sub>/M cells that were initially in close proximity (distance ≤ 15 μm). The pairwise  
235 comparison revealed that while many IK G<sub>1</sub>/G<sub>0</sub> cells remained neighbors, 30% of cells switched their  
236 partners; most S/G<sub>2</sub>/M pairs remained neighbors (Fig.5E). Tracing groups of cells that were initially,  
237 at E11.5, located next to each other in different areas of the IK, and defining cell positions 12h later  
238 showed that some cells remained close to their original neighbors but several cells ended up with a  
239 different group. (Fig.5F). Pharmacological inhibition of acto-myosin based motility, with the  
240 inhibitor blebbistatin, repressed IK G<sub>1</sub>/G<sub>0</sub> condensation and abrogated progression of tooth  
241 development (Fig.5G).

242 **Dynamics between  $Wnt^{Hi}$  and *Shh* cell populations regulate the maturation and maintenance**  
243 **of the IK**

244 Our live imaging analysis suggested that TCF/Lef:H2B-GFP reporter expressing  $Wnt^{Hi}$  cells were  
245 closely juxtaposed to *Shh* expressing  $G_1/G_0$  IK cells but they seemed to comprise two different cell  
246 populations that remained in close contact with each other through bud development (Fig.6,Mov.S4,  
247 Mov.S6,Fig.S1E). The *Shh* pathway is an important modulator for Wnt signaling for several stages  
248 of tooth development. Studies in mouse mutants have implied that *Shh* is a downstream target of  
249 Wnts and also an inhibitor of Wnt signaling via a negative feedback loop (Sarkar, et al., 2000; Sarkar  
250 and Sharpe, 1999). We next investigated the behavioral dynamics and the molecular identity of the  
251 two populations.

252 *In situ* hybridization analysis of Fucci specimens revealed that the IK  $G_1/G_0$  cells colocalized with  
253 *Shh* (Fig.S1E). A canonical Wnt, *Wnt10b*, has previously reported expression in the placode (Liu, et  
254 al., 2008). When we did a *Wnt10b* hybridization in the Fucci  $G_1/G_0$  reporter, at E11.5; however,  
255 *Wnt10b* expression was also detected, partially overlapping, but predominantly anterior to the  $G_1/G_0$   
256 focus (Fig.6D). By E12.5, the dense IK  $G_1/G_0$  colocalized with the *Shh* signal, whereas the *Wnt10b*  
257 expression covered a larger area surrounding the IK  $G_1/G_0$  condensate. By E12.75, the diffuse *Wnt10b*  
258 expression continued to reside in a wider area in the molar mesio-lingual tip. At E13.0, the  $G_1/G_0$  area  
259 was barely discernible and *Shh* and *Wnt10b* were downregulated. Concomitantly,  $G_1/G_0$ , *Shh*, and  
260 *Wnt10b* expression appeared in the emerging pEK (Fig.S1E, Fig.6A,D). There was a complete spatial  
261 correlation with *Shh* and  $G_1/G_0$  signal throughout early molar morphogenesis, but *Wnt10b* expression  
262 was seen in the area juxtaposing the  $G_1/G_0$  focus anteriorly.

263 High resolution analysis of  $G_1/G_0$  and TCF/Lef:H2B-GFP patterns showed that the *Shh*- $G_1/G_0$  cell  
264 population initiated at E11.5 was closely juxtaposed to  $Wnt^{Hi}$  cells (Fig.6B,Mov.S4). By E12.5,  $Wnt^{Hi}$   
265 cells surrounded the *Shh*- $G_1/G_0$  cells and TCF/Lef:H2B-GFP+ cells were scarcely distributed in the  
266 growing bud prior to pEK appearance (Fig.6B,Mov.S6). At E13.5,  $Wnt^{Hi}$  cells were present in the

267 pEK with G<sub>1</sub>/G<sub>0</sub> cells distributed more centrally (Fig.6B). Quantification of *Shh*-G<sub>1</sub>/G<sub>0</sub> and Wnt<sup>Hi</sup> cell  
268 populations in fixed samples showed a decrease at E12.5 in *Shh*-G<sub>1</sub>/G<sub>0</sub> cell number, concomitant with  
269 TCF/Lef:H2B-GFP downregulation and appearance of apoptosis specifically in the IK cells (Fig.6C,  
270 Fig.S5A,B) consistent with canonical Wnt signaling activity and *Shh* expression in the maintenance  
271 of the IK. To more closely examine this dynamic, we quantified the cell *Shh*-G<sub>1</sub>/G<sub>0</sub> and Wnt<sup>Hi</sup>  
272 populations with live imaging in E11.5 and E12.5+12h molars. Quantification at E11.5+12h showed  
273 that the number of Wnt<sup>Hi</sup> cells remained stable for the 12h follow-up; in contrast, the *Shh*-G<sub>1</sub>/G<sub>0</sub> cell  
274 population increased by 1.5-fold (Fig.6D). Analysis of E12.5+12h cells, showed an increase in Wnt<sup>Hi</sup>  
275 cells, throughout the bud, reaching a plateau after 4h; IK *Shh*-G<sub>1</sub>/G<sub>0</sub> cells showed a constant decrease,  
276 and G<sub>1</sub>/G<sub>0</sub> cells appeared in the pEK from 9h onward (Fig.6D).

277 Analysis of individual contributing cell populations in the initiation of the molar placode showed a  
278 border region with an accumulation of Wnt<sup>Hi</sup>-*Wnt10b* cells in the dental lamina and the G<sub>1</sub>/G<sub>0</sub>-*Shh*  
279 cells started differentiating closely juxtaposed to this region (Fig.6E). Analysis of cell movement  
280 showed differential patterns in the Wnt<sup>Hi</sup>-*Wnt10b* and G<sub>1</sub>/G<sub>0</sub>-*Shh* cell populations: track end point  
281 analysis showed specific preferential movement of G<sub>1</sub>/G<sub>0</sub>-*Shh* IK cells toward the dental lamina Wnt<sup>Hi</sup>  
282 cells (Fig.6F) with high straightness (Fig.6G) and high directional persistence in the G<sub>1</sub>/G<sub>0</sub>-*Shh* IK  
283 cell compared to oral epithelial G<sub>1</sub>/G<sub>0</sub> and dental lamina Wnt<sup>Hi</sup> cells (Fig.6H).

284 The differential distribution and cellular behaviors of Wnt<sup>Hi</sup> and *Shh*-G<sub>1</sub>/G<sub>0</sub> cells in the molar  
285 signaling centers suggests that they act in concert to initiate signaling center cell differentiation in the  
286 very early stages. The boundary between the two cell populations defines the position of the emerging  
287 molar IK and orients the directional migration pattern for condensation. Further, decreased Wnt  
288 signaling resulted in *Shh* downregulation and IK clearance.

289 **Modulation of canonical Wnt signaling affects IK cell dynamics and tooth bud shape**

290 The cell movement data suggested the presence of a chemotactic gradient from the dental lamina  
291  $Wnt^{Hi}$ -*Wnt10b* cells directing the movement and condensation of the  $G_1/G_0$ -*Shh* cell population in  
292 molars. *Wnt10b* has been implicated as a paracrine chemotactic factor in epithelial cancer contexts  
293 (Chen, et al., 2017; Aprelikova, et al., 2013). To explore if this dynamic occurs in developing molars,  
294 we modulated canonical Wnt signaling levels by stimulation with Wnt3a or a Wnt10b releasing bead,  
295 and by inhibition with a Wnt antagonist, XAV939 that acts via stimulation of  $\beta$ -catenin degradation  
296 and stabilization of axin. E11.5 explants were treated either with Wnt3a/XAV939 in the growth  
297 medium for 24h or by placing a recombinant Wnt10b soaked/control bead next to the placode at  
298 E11.5 and followed the explants for 16h.

299 We used K17-GFP to visualize the shape of the epithelium and Fucci  $G_1/G_0$  for IK cell distribution  
300 in the developing placode/bud. Stimulation with Wnt3a resulted in a flat bud compared to control  
301 (Fig.7A,B), with persisting number of  $G_1/G_0$  IK cells spread out throughout the invagination  
302 (Fig.7A,C). Inhibition of active Wnt signaling with XAV939 resulted in a complete loss of  $G_1/G_0$   
303 condensate together with a loss of invagination (Fig.7A). To study if lack of IK condensation and the  
304 loss of invagination, with Wnt modulation, was caused by lack of bud cell proliferation, we treated  
305 Fucci  $G_1/G_0$ ; S/ $G_2$ /M mandibles with Wnt3a or XAV939. Stimulation with Wnt3a resulted in lack of  
306 IK condensation followed by a drastic loss of cell proliferation in the bud (Fig.7D,E). Inhibition with  
307 XAV939 resulted in the loss of the  $G_1/G_0$  IK condensate and absence of proliferation and invagination  
308 (Fig.7D).

309 To dissect the role of *Wnt10b* on IK condensation, we placed a Wnt10b releasing or control bead  
310 close to the IK distally on the lingual side of the placode and imaged the explants at E11.5, after 8h,  
311 and 16h. While morphogenesis and IK condensation proceeded normally in both the control bud and  
312 the bud with the control bead, the bud with the Wnt10b bead showed a loss in condensation of the  
313  $G_1/G_0$  IK cells (Fig.7F). Instead, the  $G_1/G_0$  IK cells were spread out toward the Wnt10b bead.  
314 Measurement of bud dimensions showed a change in bud shape, e.g. decrease in bud elongation, in

315 Wnt10b bead buds together with a decrease in G<sub>1</sub>/G<sub>0</sub> IK cell density (Fig.S6A). The changes in IK  
316 cell distribution and bud shape were also accompanied with decrease in proliferation (Fig.S6B, C).

## 317 **Discussion**

318 The reiterative genetic regulation of tooth development via signaling centers is conserved across tooth  
319 types, but it is less understood how it is interpreted into different cellular behaviors to regulate tooth  
320 shape and size. In the present study we have identified a molar IK signaling center that is necessary  
321 for the progression of tooth development in the early stages of mammalian tooth morphogenesis: We  
322 show with live imaging, 4D whole-mount analyses, and functional ablation studies that the IK arises  
323 in the placode and is a functional signaling center that drives proliferative growth prior to the  
324 successive enamel knots. Molar IK cell dynamics displays the hallmarks of ectodermal signaling  
325 centers: cell cycle exit and condensation, and silencing through apoptosis. Cell cycle exit coupled to  
326 active condensation, takes place not only in teeth (current study, Ahtiainen et al. 2016), but also in  
327 hair placodes (Ahtiainen, et al., 2014). Condensation of the IK via active cell movement is necessary  
328 for progression of tooth budding, as inhibition of actomyosin contractility and modulation of  
329 condensation guiding Wnt signaling levels, compromised condensation and the function of the  
330 signaling center. Cell condensation could be a universal mechanism to both trigger the ectodermal  
331 signaling center differentiation and cell cycle exit by contact inhibition of cell proliferation and  
332 eventually regulate timing of signaling center silencing by initiating mechanical crowding induced  
333 apoptosis.

334 Tissue recombination studies have shown that the instructive potential in the tooth first resides in the  
335 epithelium and shifts only later to the mesenchyme (Lumsden, 1988; Mina and Kollar, 1987). EKs  
336 require inductive signals from the mesenchyme, but it is plausible that the IK inducing signal comes  
337 from planar epithelial signaling. *Wnts7b/3* and *Shh* have a mutually exclusive expression already at  
338 E10.5 in the presumptive oral and dental ectoderm (Sarkar, et al., 2000; Sarkar and Sharpe, 1999) so  
339 it appears that different Wnt expression patterns and *Shh* determine the ectodermal boundaries of  
340 competence at a very early stage. *Shh* is possibly a downstream target of Wnts and also a negative  
341 feedback inhibitor. Spatial inhibition of *Wnt10b* by *Shh* has been reported in teeth: Shh coated beads



342 repressed *Wnt10b* but no other epithelial markers (Dassule and McMahon, 1998). Constitutive  
343 activation of epithelial Wnt/ $\beta$ -catenin, somewhat later from E12.5, induced multiple patches of  
344 signaling center markers, including *Shh* and *Wnt10b* at E13-E14, and ectopic teeth (Liu, et al., 2008;  
345 Jarvinen, et al., 2006). Our work evidences that *Wnt10b* and *Shh* are differentially expressed during  
346 molar initiation and that these cell populations remain functionally separate. However, close  
347 interaction between the  $G_1/G_0$ -*Shh* and  $Wnt^{Hi}$ -*Wnt10b* expressing cells is crucial in the positioning  
348 and maintenance of the molar IK. *Wnt10b* has been implicated as a paracrine chemotactic factor in  
349 cancer contexts (Chen, et al., 2017; Aprelikova, et al., 2013). The migration of  $G_1/G_0$ -*Shh* IK cells  
350 toward the canonical Wnt gradient and specific area of endogenous *Wnt10b* expression and  
351 distribution of IK cells toward exogenous source of recombinant *Wnt10b*, suggest that *Wnt10b* carries  
352 an instructive role in signaling center condensation.

353 We show that molar invagination and growth take place through cell proliferation in both basal and  
354 suprabasal bud cell populations, driven by the non-proliferative IK. Several signaling pathways  
355 regulate behaviors in these cell populations, but the role of Hh signaling in this context has been  
356 debated. *Shh* has been interpreted to be a primary inducer of proliferation in some experimental  
357 settings, whereas other studies suggest a role in bud cell rearrangement (Li, et al., 2016b; Prochazka,  
358 et al., 2015; Cobourne, et al., 2009; Hardcastle, et al., 1998). *Shh* expression is a hallmark of signaling  
359 centers, and while autocrine signaling cannot be ruled out, most of the responsive cells seem to reside  
360 elsewhere: at later stages, from E14.5 onwards, the pEK expresses *Shh* but receptor *Ptch* and  
361 downstream targets *Gli1/2/3* are expressed in the mesenchyme (Hardcastle, et al., 1998; Vaahtokari,  
362 et al., 1996a). In early stages from E11.0, the transducer *Smo* is ubiquitously expressed, whereas  
363 *Ptch1* and *Gli1* are mostly in the mesenchyme (Dassule and McMahon, 1998; Hardcastle, et al.,  
364 1998). Interestingly, by E12.0, the expression of both *Ptch1* and *Gli1/2* have been reported in the  
365 emerging epithelial bud. Notably, in our analyses, proliferation coincided with this. The inhibition of  
366 *Shh* signaling at the placode stage resulted in loss of proliferation in the bud. Thus, it seems that in

367 the IK, *Shh* expressing cells are different from Shh responsive cells and signaling can induce  
368 proliferation. In agreement, early findings from conditional *Shh* mutants show smaller teeth and  
369 posteriorly misplaced buds (Dassule, et al., 2000; Dassule and McMahon, 1998). In the limb bud,  
370 Shh has been reported to affect proliferation both directly and indirectly via induction of Fgfs in the  
371 AER (Prykhodzij and Neumann, 2008; Towers, et al., 2008). In the tooth, other factors downstream  
372 of the initial placodal inducer Shh, such as Fgfs, likely contribute to bud invagination via proliferation  
373 mainly in basal cells, and possibly concurrent with stratification (current study, (Li, et al., 2016b).

374 Expression levels of *Shh* may specifically affect signaling center identity, differentiation, and  
375 maintenance. *Shh* overexpression arrests development at the bud stage due to lack of proliferation,  
376 and multiple superficial invaginations are induced in the epithelium but still fail to develop further  
377 (Cobourne, et al., 2009). It is tempting to hypothesize that exogenous *Shh* expression would drive  
378 cells into abnormal cell cycle exit and/or a change in fate into a signaling center. Signaling center  
379 maintenance may also be associated with *Shh* expression levels. Shh has been shown to be protective  
380 of early apoptosis in the tooth (Cobourne, et al., 2001). Apoptosis is a mechanism used to silence  
381 signaling centers in teeth, the AER of the limb, and in embryonic brain development (Nonomura, et  
382 al., 2013; Matalova, et al., 2004; Vaahtokari, et al., 1996b). The interplay between  $Wnt^{Hi}$  and *Shh*+  
383 cells may serve as a feedback mechanism regulating the timing of apoptosis in the IK.

384 We demonstrate that the pEK in the molar is formed de novo without clonal contribution from the  
385 IK, and that the IK is apoptotically silenced upon pEK appearance. This differs mechanistically from  
386 signaling centers later in molar development, where the pEK contributes cells to sEKs (Du, et al.,  
387 2017). The development of teeth is conserved, however, in being driven by the iterative use of  
388 signaling centers. We have shown functionally here that the progression of early molar  
389 morphogenesis is dependent on the IK signaling center that arises in the placode and exhibits many  
390 hallmarks of ectodermal signaling centers. What differentiates the IK from the later signaling centers  
391 on a transcriptomic level will be of special interest to future studies.

392 **Acknowledgments**

393 We thank Frederic Michon and Jukka Jernvall for critical reading of the manuscript. Imaging was  
394 done at the Light Microscopy Unit/Institute of Biotechnology, University of Helsinki. The work was  
395 financially supported by the Academy of Finland, the Sigrid Jusélius Foundation, Finnish Cultural  
396 Foundation and Helsinki Institute of Life Sciences.

397 The authors declare no competing financial interests.

398

399 **Author Contributions**

400 Conceptualization L.A. and I.M.; Methodology, I.M., M.N., L.A.; Investigation I.M., M.N., L.A;

401 Writing Original draft, L.A., I.M. and J.M-V; Writing, Review and Editing L.A., I.M., J.M-V and

402 M.N.; Funding Acquisition L.A.; Supervision L.A.

403 **References**

- 404 Ahtiainen, L., Lefebvre, S., Lindfors, P.H., Renvoise, E., Shirokova, V., Vartiainen, M.K., Thesleff,  
405 I., and Mikkola, M.L. (2014). Directional cell migration, but not proliferation, drives hair placode  
406 morphogenesis. *Developmental cell* 28, 588-602.
- 407 Ahtiainen, L., Uski, I., Thesleff, I., and Mikkola, M.L. (2016). Early epithelial signaling center  
408 governs tooth budding morphogenesis. *J Cell Biol* 214, 753-67.
- 409 Aprelikova, O., Palla, J., Hibler, B., Yu, X., Greer, Y.E., Yi, M., Stephens, R., Maxwell, G.L.,  
410 Jazaeri, A., Risinger, J.I., et al. (2013). Silencing of miR-148a in cancer-associated fibroblasts  
411 results in WNT10B-mediated stimulation of tumor cell motility. *Oncogene* 32, 3246-53.
- 412 Biggs, L.C., and Mikkola, M.L. (2014). Early inductive events in ectodermal appendage  
413 morphogenesis. *Seminars in cell & developmental biology* 25-26, 11-21.
- 414 Chen, Y., Zeng, C., Zhan, Y., Wang, H., Jiang, X., and Li, W. (2017). Aberrant low expression of  
415 p85alpha in stromal fibroblasts promotes breast cancer cell metastasis through exosome-mediated  
416 paracrine Wnt10b. *Oncogene* 36, 4692-4705.
- 417 Cobourne, M.T., Hardcastle, Z., and Sharpe, P.T. (2001). Sonic hedgehog regulates epithelial  
418 proliferation and cell survival in the developing tooth germ. *J Dent Res* 80, 1974-9.
- 419 Cobourne, M.T., Xavier, G.M., Depew, M., Hagan, L., Sealby, J., Webster, Z., and Sharpe, P.T.  
420 (2009). Sonic hedgehog signalling inhibits palatogenesis and arrests tooth development in a mouse  
421 model of the nevoid basal cell carcinoma syndrome. *Dev Biol* 331, 38-49.
- 422 Dassule, H.R., Lewis, P., Bei, M., Maas, R., and McMahon, A.P. (2000). Sonic hedgehog regulates  
423 growth and morphogenesis of the tooth. *Development* 127, 4775-85.
- 424 Dassule, H.R., and McMahon, A.P. (1998). Analysis of epithelial-mesenchymal interactions in the  
425 initial morphogenesis of the mammalian tooth. *Dev Biol* 202, 215-27.
- 426 Devenport, D., and Fuchs, E. (2008). Planar polarization in embryonic epidermis orchestrates global  
427 asymmetric morphogenesis of hair follicles. *Nat Cell Biol* 10, 1257-68.

- 428 Du, W., Hu, J.K., Du, W., and Klein, O.D. (2017). Lineage tracing of epithelial cells in developing  
429 teeth reveals two strategies for building signaling centers. *J Biol Chem* 292, 15062-15069.
- 430 Fliniaux, I., Mikkola, M.L., Lefebvre, S., and Thesleff, I. (2008). Identification of *dkk4* as a target  
431 of Eda-A1/Edar pathway reveals an unexpected role of ectodysplasin as inhibitor of Wnt signalling  
432 in ectodermal placodes. *Dev Biol* 320, 60-71.
- 433 Hardcastle, Z., Mo, R., Hui, C.C., and Sharpe, P.T. (1998). The Shh signalling pathway in tooth  
434 development: defects in *Gli2* and *Gli3* mutants. *Development* 125, 2803-11.
- 435 Harfe, B.D., Scherz, P.J., Nissim, S., Tian, H., McMahon, A.P., and Tabin, C.J. (2004). Evidence  
436 for an expansion-based temporal Shh gradient in specifying vertebrate digit identities. *Cell* 118,  
437 517-28.
- 438 Huh, S.H., Jones, J., Warchol, M.E., and Ornitz, D.M. (2012). Differentiation of the lateral  
439 compartment of the cochlea requires a temporally restricted FGF20 signal. *PLoS Biol* 10,  
440 e1001231.
- 441 Jarvinen, E., Salazar-Ciudad, I., Birchmeier, W., Taketo, M.M., Jernvall, J., and Thesleff, I. (2006).  
442 Continuous tooth generation in mouse is induced by activated epithelial Wnt/beta-catenin signaling.  
443 *Proceedings of the National Academy of Sciences of the United States of America* 103, 18627-32.
- 444 Jernvall, J., Kettunen, P., Karavanova, I., Martin, L.B., and Thesleff, I. (1994). Evidence for the role  
445 of the enamel knot as a control center in mammalian tooth cusp formation: non-dividing cells  
446 express growth stimulating *Fgf-4* gene. *Int J Dev Biol* 38, 463-9.
- 447 Jernvall, J., and Thesleff, I. (2000). Reiterative signaling and patterning during mammalian tooth  
448 morphogenesis. *Mechanisms of development* 92, 19-29.
- 449 Kim, R., Green, J.B.A., and Klein, O.D. (2017). From snapshots to movies: Understanding early  
450 tooth development in four dimensions. *Dev Dyn* 246, 442-450.

- 451 Li, C.Y., Hu, J., Lu, H., Lan, J., Du, W., Galicia, N., and Klein, O.D. (2016a). alphaE-catenin  
452 inhibits YAP/TAZ activity to regulate signalling centre formation during tooth development. *Nat*  
453 *Commun* 7, 12133.
- 454 Li, J., Chatzeli, L., Panousopoulou, E., Tucker, A.S., and Green, J.B. (2016b). Epithelial  
455 stratification and placode invagination are separable functions in early morphogenesis of the molar  
456 tooth. *Development* 143, 670-81.
- 457 Liu, F., Chu, E.Y., Watt, B., Zhang, Y., Gallant, N.M., Andl, T., Yang, S.H., Lu, M.M., Piccolo, S.,  
458 Schmidt-Ullrich, R., et al. (2008). Wnt/beta-catenin signaling directs multiple stages of tooth  
459 morphogenesis. *Dev Biol* 313, 210-24.
- 460 Lumsden, A.G. (1988). Spatial organization of the epithelium and the role of neural crest cells in  
461 the initiation of the mammalian tooth germ. *Development* 103 Suppl, 155-69.
- 462 Martin, P. (1990). Tissue patterning in the developing mouse limb. *Int J Dev Biol* 34, 323-36.
- 463 Matalova, E., Tucker, A.S., and Sharpe, P.T. (2004). Death in the life of a tooth. *J Dent Res* 83, 11-  
464 6.
- 465 Mina, M., and Kollar, E.J. (1987). The induction of odontogenesis in non-dental mesenchyme  
466 combined with early murine mandibular arch epithelium. *Arch Oral Biol* 32, 123-7.
- 467 Narhi, K., and Thesleff, I. (2010). Explant culture of embryonic craniofacial tissues: analyzing  
468 effects of signaling molecules on gene expression. *Methods Mol Biol* 666, 253-67.
- 469 Nonomura, K., Yamaguchi, Y., Hamachi, M., Koike, M., Uchiyama, Y., Nakazato, K., Mochizuki,  
470 A., Sakaue-Sawano, A., Miyawaki, A., Yoshida, H., et al. (2013). Local apoptosis modulates early  
471 mammalian brain development through the elimination of morphogen-producing cells.  
472 *Developmental cell* 27, 621-34.
- 473 Prochazka, J., Pantalacci, S., Churava, S., Rothova, M., Lambert, A., Lesot, H., Klein, O., Peterka,  
474 M., Laudet, V., and Peterkova, R. (2010). Patterning by heritage in mouse molar row development.  
475 *Proceedings of the National Academy of Sciences of the United States of America* 107, 15497-502.

476 Prochazka, J., Prochazkova, M., Du, W., Spoutil, F., Tureckova, J., Hoch, R., Shimogori, T.,  
477 Sedlacek, R., Rubenstein, J.L., Wittmann, T., et al. (2015). Migration of Founder Epithelial Cells  
478 Drives Proper Molar Tooth Positioning and Morphogenesis. *Developmental cell* 35, 713-24.  
479 Prykhozhiy, S.V., and Neumann, C.J. (2008). Distinct roles of Shh and Fgf signaling in regulating  
480 cell proliferation during zebrafish pectoral fin development. *BMC Dev Biol* 8, 91.  
481 Sakaue-Sawano, A., Kurokawa, H., Morimura, T., Hanyu, A., Hama, H., Osawa, H., Kashiwagi, S.,  
482 Fukami, K., Miyata, T., Miyoshi, H., et al. (2008). Visualizing spatiotemporal dynamics of  
483 multicellular cell-cycle progression. *Cell* 132, 487-98.  
484 Sarkar, L., Cobourne, M., Naylor, S., Smalley, M., Dale, T., and Sharpe, P.T. (2000). Wnt/Shh  
485 interactions regulate ectodermal boundary formation during mammalian tooth development.  
486 *Proceedings of the National Academy of Sciences of the United States of America* 97, 4520-4.  
487 Sarkar, L., and Sharpe, P.T. (1999). Expression of Wnt signalling pathway genes during tooth  
488 development. *Mechanisms of development* 85, 197-200.  
489 Shirokova, V., Jussila, M., Hytonen, M.K., Perala, N., Drogemuller, C., Leeb, T., Lohi, H., Sainio,  
490 K., Thesleff, I., and Mikkola, M.L. (2013). Expression of Foxi3 is regulated by ectodysplasin in  
491 skin appendage placodes. *Dev Dyn* 242, 593-603.  
492 Towers, M., Mahood, R., Yin, Y., and Tickle, C. (2008). Integration of growth and specification in  
493 chick wing digit-patterning. *Nature* 452, 882-6.  
494 Tummers, M., and Thesleff, I. (2009). The importance of signal pathway modulation in all aspects  
495 of tooth development. *J Exp Zool B Mol Dev Evol* 312B, 309-19.  
496 Vaahtokari, A., Aberg, T., Jernvall, J., Keranen, S., and Thesleff, I. (1996a). The enamel knot as a  
497 signaling center in the developing mouse tooth. *Mechanisms of development* 54, 39-43.  
498 Vaahtokari, A., Aberg, T., and Thesleff, I. (1996b). Apoptosis in the developing tooth: association  
499 with an embryonic signaling center and suppression by EGF and FGF-4. *Development* 122, 121-9.



500 Wang, J., and Shackleford, G.M. (1996). Murine Wnt10a and Wnt10b: cloning and expression in  
501 developing limbs, face and skin of embryos and in adults. *Oncogene* 13, 1537-44.

502 **Figure Legends**

503 **Figure 1. A molar initiation knot is established in the molar placode and early bud in G<sub>1</sub>/G<sub>0</sub>**  
504 **cells positive for signaling center markers**

505 Confocal fluorescence images of mouse embryonic mandibles of the cell cycle indicator (Fucci) for  
506 G<sub>1</sub>/G<sub>0</sub> phase (red) and signaling center marker Shh<sup>GFP</sup>(green) and Fgf20<sup>βGal</sup>(βGal staining, magenta)  
507 Immunofluorescence staining of the epithelium (EpCam, grey, dotted line), early G<sub>1</sub>/G<sub>0</sub> focus  
508 (arrowhead), presumptive primary enamel knot (pEK)(asterisk). Planar view from the mesenchyme  
509 toward the epithelium. (A) G<sub>1</sub>/G<sub>0</sub> phase cells were present throughout the dental lamina and the molar  
510 placode, as incisor and molar resolved into separate domains at E11.5. At E12.5, G<sub>1</sub>/G<sub>0</sub> cells formed  
511 a focus mesially in the molar early bud. This focus remained close to epithelial surface mesio-  
512 lingually. At E13.0, G<sub>1</sub>/G<sub>0</sub> cells corresponding to the presumptive pEK emerged in the tip of the bud  
513 and condensed by E13.5. (B) Shh<sup>GFP</sup> reporter and (C) Fgf20<sup>βGal</sup> signaling center marker showed  
514 expression corresponding to G<sub>1</sub>/G<sub>0</sub> foci throughout placode and bud morphogenesis and in the  
515 emerging pEK.

516

517 **Figure 2. The molar IK is a functional signaling center driving budding via proliferation**

518 (A) Still images of live tissue confocal microscopy of the Fucci  $G_1/G_0$  reporter to visualize the molar  
519 IK cells and K17-GFP (green) reporter to visualize the borders and shape of the epithelial bud from  
520 E12.5+16h showed that the IK stays an integral part of the developing bud. (B) Confocal fluorescence  
521 images of whole mount explants Fucci  $G_1/G_0$  (red), S/ $G_2/M$  (green), epithelium (EpCam, white,  
522 dotted line), IK (arrowhead) and pEK (asterisk). Initially S/ $G_2/M$  cells were seen throughout the oral  
523 epithelium and by E12.5, in the early bud posterior to the IK in both basal and suprabasal populations.  
524 IK and pEK cells remained in  $G_1/G_0$  phase. (C) Surface rendering of the nuclei in  $G_1/G_0$  and S/ $G_2/M$   
525 cell cycle phases in the developing molar placode/bud epithelium. (D) Quantification of cell cycle  
526 phases in live imaging E11.5+12h and (E) E12.5+12h molars (N=5, N=3, mean $\pm$ SEM).

527 **Figure 3. Laser ablation of the IK arrests molar bud growth**

528 Confocal fluorescence images of whole mount explant cultures K17-GFP/ Fucci S/G<sub>2</sub>/M (green),  
529 Fucci G<sub>1</sub>/G<sub>0</sub> (red), tooth placode/bud epithelium (dotted line), Hoechst (blue), IK (arrowhead) and  
530 pEK (asterisk). The IK was laser ablated (position marked with a viewfinder symbol ☒) at E11.5,  
531 E12.5 or E12.75 followed by 24h culturing. (A) Laser ablation of the IK G<sub>1</sub>/G<sub>0</sub> cells in the early  
532 placode stage (E11.5) epithelium abrogated epithelial invagination and growth. In the control tooth  
533 invagination proceeded normally. (B) Early bud stage (E12.5) ablation completely arrested bud  
534 invagination and elongation. (C) Bud dimensions of ablated and control molars at E11.5+24h and  
535 E12.5+24h (fold change over E11.5, N<sub>E11.5+24h</sub>=9, N<sub>E12.5+24h</sub>=8, mean±SEM, Mann-Whitney U,\*  
536  $p \leq 0.05$ , \*\*  $p \leq 0.01$ , \*\*\*  $p \leq 0.001$ ). (D) Ablation at E12.75 arrested bud growth. However, a cluster of  
537 G<sub>1</sub>/G<sub>0</sub> cells emerged in the bottom of bud in the epithelium mesenchyme interface. (E) Laser ablation  
538 of the IK in the Fucci S/G<sub>2</sub>/M model at E11.5 resulted in loss of bud cell proliferation. S/G<sub>2</sub>/M cells  
539 present in the adjacent oral epithelium confirmed good tissue health. (F) Quantification of  
540 proliferating cells in E11.5+24h molars (N=8, mean±SEM Mann-Whitney U,  $p \leq 0.001$ ). (G) Bud cell  
541 proliferation and consequently bud growth were similarly abrogated in E12.5 ablated molars. (H)  
542 Quantification of proliferating cells in E12.5+24h molars (fold change over E12.5, N=8, mean±SEM  
543 Mann-Whitney U,  $p \leq 0.01$ ).

544 **Figure 4. The IK remains an integral part of the tooth and does not contribute cells to the pEK**  
545 **that arises independently**

546 (A) Still images of a Fucci  $G_1/G_0$  (red) and  $S/G_2/M$  (green) live tissue time lapse confocal imaging  
547 from placode stage E11.5+12h. (B) Tracks and displacement vectors of individual cells at E11.5+12h  
548 molar Fucci  $G_1/G_0$ ,  $S/G_2/M$ , placode epithelium border (dotted line). (C) Still images of a Fucci  $G_1/G_0$   
549 (red) and TCF/Lef:H2B-GFP (green) reporter time lapse E11.5+12h. (D) E11.5+12h cell tracks and  
550 displacement of individual Fucci  $G_1/G_0$ , TCF/Lef:H2B-GFP, cells and cells positive for both  
551 reporters. (E) Still images of a Fucci  $G_1/G_0$  and  $S/G_2/M$  reporter live imaging form early bud stage  
552 E12.5+12h. (F) E12.5+12h cell tracks and displacement of individual Fucci  $G_1/G_0$  and  $S/G_2/M$  cells  
553 (G) Still images of a Fucci  $G_1/G_0$  and TCF/Lef:H2B-GFP live imaging E12.5+12h. (H) Cell tracks  
554 and displacement E12.5+12h Fucci  $G_1/G_0$ , TCF/Lef:H2B-GFP, and Fucci  $G_1/G_0$ +TCF/Lef:H2B-  
555 GFP.

556

557 **Figure 5. Cell condensation and active directional cell migration drive molar IK maturation**

558 (A) Confocal fluorescence images of Fucci G<sub>1</sub>/G<sub>0</sub> (red) molars, cell borders (EpCam, white, dotted  
559 line), Hoechst (blue). (B) Quantification of IK and oral epithelial cell density ( $N_{\text{placode/bud}}=N_{\text{oral}}=10$ ,  
560 Mann-Whitney U,  $p \leq 0.001$ ). (C) Quantification cell of track length and net displacement in molar  
561 placode/bud and oral epithelium at E11.5+12h ( $N_{\text{G1/G0 IK}}=149$ ,  $N_{\text{G1/G0 oral}}=45$ ,  $N_{\text{S/G2/M}}=146$ , Mann-  
562 Whitney U,  $p \leq 0.001$ \*\*\*) and E12.5+12 h ( $N_{\text{G1/G0 IK}}=90$ ,  $N_{\text{G1/G0 oral}}=51$ ,  $N_{\text{S/G2/M}}=317$ , Mann-Whitney  
563 U,  $p \leq 0.05$ ). (D) Quantification of molar IK and oral epithelial cell movement angles E11.5+12h. ( $N_{\text{IK}}$   
564  $\text{cells}=N_{\text{oral epithelial cells}}=95$ , Rayleigh test:  $H_0=\text{random}$ , IK  $p \leq 0.001$ , oral  $p > 0.05$ ). (E) Pairwise  
565 comparison of molar IK G<sub>1</sub>/G<sub>0</sub> and bud S/G<sub>2</sub>M cell positions ( $N_{\text{pairs}}=40$ , Mann-Whitney U test,  
566  $p \leq 0.05$ ). (F) Tracing of groups of cells at E11.5 that resided close to each other (respectively color  
567 coded) and positions of the individual cells 12h later. Cells switching neighbors (asterisk). (G)  
568 Confocal fluorescence whole mount images of Fucci G<sub>1</sub>/G<sub>0</sub> (red) and K17-GFP (green) reporter.  
569 E11.75 cultures were treated at the time of most active IK G<sub>1</sub>/G<sub>0</sub> cell movement with blebbistatin for  
570 24h to inhibit actomyosin based cell motility. Blebbistatin treatment repressed IK G<sub>1</sub>/G<sub>0</sub> cell  
571 condensation and arrested bud morphogenesis.

572 **Figure 6. Dynamics between  $Wnt^{Hi}$  and  $Shh$  cell populations regulate the maturation and**  
573 **maintenance of the IK**

574 (A) Fucci  $G_1/G_0$  fluorescence images overlaid with whole-mount DIG *in situ* hybridization for  
575  $Wnt10b$ . (B) Single cell resolution analysis of Fucci  $G_1/G_0$  (red) and TCF/Lef:H2B-GFP (green),  
576 reporter for active Wnt/ $\beta$ -catenin signaling, patterns. EpCam (white, dotted line), IK (arrowhead) and  
577 pEK (asterisk). At E11.5, TCF/Lef:H2B-GFP high intensity ( $Wnt^{Hi}$ ) was present in the dental lamina  
578 and the molar IK  $G_1/G_0$  condensate was located next to a border of  $Wnt^{Hi}$  cells. At E12.5, IK  $G_1/G_0$   
579 only cells were surrounded by  $Wnt^{Hi}$  cells. At E13.5,  $G_1/G_0$  and  $Wnt^{Hi}$  cells were present in the  
580 presumptive pEK region. (C) Quantification number of cells in  $Wnt^{Hi}$ ,  $G_1/G_0$  and double positive cell  
581 populations in fixed samples ( $N_{E11.5}=413$ ;  $N_{E12.5}=192$ ; E13.5  $N_{IK}=136$   $N_{pEK}=831$ , mean $\pm$ SEM, non-  
582 parametric Student's t-test,  $p\leq 0.05^*$ ,  $p\leq 0.01^{**}$ ,  $p\leq 0.001^{***}$ ). (D) Quantification of cell number in  
583 each population from live tissue imaging E11.5+12h and E12.5+12h ( $N_{E11.5+12h} = N_{E12.5+12h} = 3$ ,  
584 mean $\pm$ SEM). (E) Surface rendering still images of E11.5+12h molar time-lapse, Fucci  $G_1/G_0$ ,  
585 TCF/Lef:H2B-GFP, and double cells. At E11.5+3h onwards the  $G_1/G_0$  cell population started  
586 differentiating closely juxtaposed to  $Wnt^{Hi}$  cells with increasing number of cells transitioning to  
587  $G_1/G_0$ . (F) Track end point analysis (median: red cross,  $N_{IK\ G1/G0}=128$ ,  $N_{oral\ G1/G0}=63$ ,  $N_{WntHi}=104$ ).  
588 Molar IK  $G_1/G_0$  cells showed preferential distribution toward the  $Wnt^{Hi}$  region (forward). (G) Track  
589 straightness in molar IK  $G_1/G_0$ , oral epithelial  $G_1/G_0$  and TCF/Lef:H2B-GFP+ cell populations ( $N_{IK\ G1/G0}=128$ ,  
590  $N_{oral\ G1/G0}=42$ ,  $N_{WntHi}=67$ , Mann-Whitney U,  $p\leq 0.001$ ). (E) Decay of cellular persistence  
591 ( $N_{IK\ G1/G0}=80$ ,  $N_{oral\ G1/G0}=50$ ,  $N_{WntHi}=71$ ).

592 **Figure 7. Modulation of canonical Wnt signaling affects IK cell dynamics and molar bud**  
593 **shape**

594 (A) Confocal fluorescence images of explants cultures K17-GFP (green), Fucci G<sub>1</sub>/G<sub>0</sub> (red), tooth  
595 placode/bud epithelium (dotted line). Canonical Wnt signaling levels were modulated from placode  
596 stage E11.5+24h by stimulation with Wnt3a, or inhibition with XAV939. Stimulation resulted in a  
597 flat bud with persisting G<sub>1</sub>/G<sub>0</sub> IK cells throughout the invagination. Inhibition led to a complete loss  
598 of the G<sub>1</sub>/G<sub>0</sub> condensate and abrogated invagination. (B) Quantification of bud dimensions in Wnt3a  
599 stimulated and control cultures (fold change over E11.5, N<sub>ctrl</sub>=12, N<sub>Wnt3a</sub>=10, mean±SEM, Mann-  
600 Whitney U,  $p \leq 0.001$ ). (C) Quantification of IK cell number, density and area in Wnt3a stimulated  
601 and control cultures (fold change over E11.5, N<sub>ctrl</sub>=12, N<sub>Wnt3a</sub>=10, mean±SEM, Mann-Whitney U,  
602  $p \leq 0.001$ ). (D) Stimulation with Wnt3a in Fucci G<sub>1</sub>/G<sub>0</sub>; S/G<sub>2</sub>/M cultures resulted in lack of IK  
603 condensation followed by a drastic loss of cell proliferation in the bud. Inhibition with XAV939  
604 resulted in the loss of the G<sub>1</sub>/G<sub>0</sub> IK condensate and absence of proliferation and invagination (E)  
605 Quantification of cell proliferation in Wnt3a stimulated and control cultures (fold change over E11.5,  
606 N<sub>ctrl</sub>=7, N<sub>Wnt3a</sub>=8, mean±SEM, Mann-Whitney U,  $p \leq 0.01$ ). (F) A Wnt10b recombinant protein  
607 releasing or control bead was placed close to the IK (visualized with Fucci G<sub>1</sub>/G<sub>0</sub> reporter) distally on  
608 the lingual side of the placode and the explants were imaged at E11.5, after 8h, and 16h.  
609 Morphogenesis and IK condensation proceeded normally in control buds without beads and with a  
610 control bead. The Wnt10b bead showed a loss in condensation of the G<sub>1</sub>/G<sub>0</sub> IK cells. Instead the G<sub>1</sub>/G<sub>0</sub>  
611 IK cells were spread out toward the Wnt10b bead.



## 612 **Materials and Methods**

### 613 **Animals, tissues preparation and culture treatments**

614 All mouse studies were approved by the National Animal Experiment Board. Transgenic mouse  
615 reporter lines: fluorescent cell cycle indicator (Fucci) mice express a nuclear red fluorescent reporter  
616 in G<sub>1</sub>/G<sub>0</sub> phase (Cdt1-mKO) and green fluorescent reporter in S/G<sub>2</sub>/M phases (Gem-mAZ) (Sakaue-  
617 Sawano, et al., 2008). Shh<sup>GFPCre</sup> mice (#005622, Jackson Laboratories) express GFP consistent with  
618 endogenous *Shh* locus marking signaling centers (Harfe, et al., 2004), K17-GFP mice visualize the  
619 tooth epithelium (#023965, Jackson Laboratories). TCF/Lef:H2B-GFP mice, are indicators of Wnt/ $\beta$ -  
620 catenin signaling, containing several copies of TCF/Lef1 DNA binding sites driving expression of  
621 the H2B-EGFP fusion protein (#013752; Jackson Laboratories); FGF20 <sup>$\beta$ Gal</sup> mice have an Fgf20- $\beta$ -  
622 galactosidase ( $\beta$ Gal) knock-in allele (Huh, et al., 2012). Embryos were staged according to limb  
623 morphological criteria; vaginal plug day was embryonic day (E)0.5 (Martin, 1990).

624 Embryonic mandibles were dissected at E11.5-E13.5 and whole mount explants were fixed from 2h  
625 to overnight in 4% PFA or cultured in a Trowell-type tissue culture as described previously (Narhi  
626 and Thesleff, 2010). For live imaging experiments tissues were maintained in D-MEM/F12 without  
627 phenol red and supplemented with 50U/ml penicillin, 50 $\mu$ g/ml streptomycin, 10% FCS and HEPES  
628 15mM (Gibco). For inhibitor/activator treatments samples were dissected at E11.5 or E11.75, and  
629 vehicle or smoothed inhibitor cyclopamine was applied for inhibition of Shh signaling (50 $\mu$ M;  
630 Sigma-Aldrich), blebbistatin to inhibit actomyosin mediated cell motility (100 $\mu$ M; Sigma-Aldrich),  
631 pan-FGFR inhibitor SU5420 (20 $\mu$ M; Calbiochem), recombinant Wnt3a (10ng/ml; R&D Systems) for  
632 stimulation and XAV939 (10 $\mu$ M; Tocris) to inhibit canonical Wnt signaling was added to the growth  
633 medium for 24h. For bead implantation, heparin acrylic beads (MCLAB) were incubated with  
634 100 $\mu$ g/ml recombinant human Wnt10b protein (0.1mg/ml;R&D Systems) at 37°C for 30 minutes.  
635 Control beads were soaked with similar concentrations of BSA under the same conditions. Protein-

636 soaked beads were stored at 4°C and used within one week. Beads were applied on tissue explant  
637 cultures at E11.5 distally on the lingual side of the placode and tissues were imaged at the start point,  
638 after 8 and 16h to ensure good tissue condition.

### 639 **Whole mount immunofluorescence, fluorescence microscopy and *in situ*** 640 **hybridization**

641 For whole mount immunofluorescence staining fixed tissues were permeabilized with 0.5% TritonX-  
642 100 for 2h RT and washed with PBS. Unspecific staining was blocked by incubation in 5% normal  
643 donkey/goat serum, 0.3% BSA, 0.1% TritonX-100 in PBS 1h RT. Tissues were incubated overnight  
644 in +4°C with the primary antibody rat polyclonal anti-mouse CD326 (EpCam, 1:1000, Pharmingen),  
645 rabbit polyclonal  $\beta$ Gal (1:400, MP Biomedicals), rabbit polyclonal cleaved caspase 3 (1:400, Cell  
646 Signaling Technologies) or goat polyclonal sonic hedgehog antibody (1:100, R&D Systems) and  
647 detected with Alexa Fluor-488, Alexa Fluor-568 or Alexa Fluor-647 conjugated secondary antibodies  
648 (1:500, BD and Invitrogen) and nuclei were stained with Hoechst 33342. Tissues were mounted with  
649 Vectashield (Vector Laboratories) and imaged with either Leica Biosystems TCS SP5 microscope  
650 and HC PL APO 10 $\times$ /0.4 (air), HCX PL APO 20 $\times$ /0.7 Imm Corr (water, glycerol, oil) Lbd.bl and  
651 HCX APO 63 $\times$ /1.30 Corr (glycerol) CS 21 objectives or Zeiss LSM700 microscope and HC PL APO  
652 10 $\times$ /0.45 (air) and LD LCI PL APO 25 $\times$ /0.8 Imm Corr (water, glycerol, oil) objectives. For analysis  
653 of TCF/Lef:H2B-GFP signal intensities, the cutoff value for high and low expressing cells was  
654 adjusted according to overall signal intensity in each sample. All results represent at least three  
655 independent experiments.

656 For combined fluorescence and whole mount *in situ* hybridization analyses: Fluorescent imaging for  
657 fixed Fucci G<sub>1</sub>/G<sub>0</sub> reporter whole mount mandibles was first done with a Zeiss SteREO Lumar.V12  
658 microscope, NeoLumar S 0.8 $\times$ /WD 80-mm objective, and Zeiss Axiocam MRm3 CCD camera. The  
659 samples were then subjected to whole mount *in situ* hybridization with digoxigenin-labeled probes  
660 specific for *Shh* or *Wnt10b* performed as described previously (Shirokova, et al., 2013; Fliniaux, et

661 al., 2008; Wang and Shackelford, 1996). Imaging of the hybridization signal was done with the same  
662 Zeiss Lumar microscope and Zeiss AxioCam ICc1 CCD camera and images were transposed.

### 663 **Fluorescence confocal microscopy and time-lapse imaging and laser ablation**

664 For 3D time-lapse imaging dissected tissues were allowed to recover for a minimum of 2h prior to  
665 imaging. The explants were imaged as described previously (Ahtiainen, et al., 2016; Ahtiainen, et al.,  
666 2014) with an upright Leica Biosystems TCS SP5 microscope, HC PL APO 10×/0.4 (air) objective  
667 in a trowel-type culture setup. Z-stacks of 3μm optical sections were acquired at 20min intervals.  
668 Good tissue health was confirmed by lack of pyknotic nuclei and frequency of mitoses in every  
669 acquired z-stack. For determination of cell cycle status and cell quantification, only cells that were  
670 distinctly identified as either G<sub>1</sub>/G<sub>0</sub> or S/G<sub>2</sub>/M were scored. For Wnt/β-catenin signaling activity  
671 TCF/Lef:H2B-GFP cells were scored individually for median fluorescence intensity in each nucleus  
672 and presence of G<sub>1</sub>/G<sub>0</sub> signal. All results represent at least three independent experiments.

673 Laser ablations were done with an upright Leica Biosystems TCS SP5 microscope, HC PL APO  
674 10×/0.4 (air) objective and a tunable Ti:Sapphire pulsed IR laser (Spectra Physics, MaiTai, tunable  
675 range 690-1040nm) at room temperature with an excitation wavelength 800nm and 2.95W of laser  
676 power (100%) for 3-10 seconds. The pulse was targeted to the IK, visualized with the Fucci reporter,  
677 using zoom factor 20-40x. Efficiency of ablation was verified by acquiring confocal fluorescence Z-  
678 stacks of the sample immediately after ablation. After 24h of culture tissues were fixated, Fucci cell  
679 cycle reporter samples were immunofluorescence stained with EpCam to visualize the epithelium,  
680 and all samples were stained with Hoechst 33342 to visualize nuclei. Samples were imaged with the  
681 Zeiss LSM700 microscope, with HC PL APO 10×/0.45 (air) and LD LCI PL APO 25×/0.8 Imm Corr  
682 (glycerol) objectives. Specificity of ablation was verified by the absence of Fucci G<sub>1</sub>/G<sub>0</sub> phase (Cdt1-  
683 mKO) positive cells in the IK region and ablation of only the epithelial compartment visualized with  
684 the K17-GFP reporter and Hoechst staining. Good tissue health of the adjacent, non-ablated tissue,

685 was confirmed by lack of pyknotic nuclei and presence of normal cell proliferation patterns with the  
686 Fucci reporter.

## 687 **Quantitative and statistical analyses of experimental data**

688 Analyses of images and quantitative measurements were done with Imaris 9.0.1 (Bitplane) and  
689 ImageJ software. Images were processed for presentation with Photoshop CC and Illustrator CC  
690 software (Adobe Systems). Statistical analysis and further graphing were done with PAST  
691 (<http://folk.uio.no/ohammer/past/>; Hammer et al., 2001), and SPSS Statistics (IBM) software.

692 Measurements were done from whole mount volume renderings of confocal optical Z-stacks. For  
693 quantifying cell density individual cell borders were visualized and traced in 3D with the EpCam  
694 staining in whole-mount tissues. Cell densities were quantified by masking a volume in tooth  
695 epithelium/equal volume in the oral epithelium, and defined as areas occupied by the cell (selecting  
696 a cross section in 3D view in the middle of the cell). Box-and-whiskers plots represent minimum,  
697 25th percentile, median, 75th percentile, and maximum values for each dataset. Differences between  
698 groups were assessed with the Mann-Whitney U test.

699 All cell movement, follow up and division analyses were done from stereoscopic 3D renderings,  
700 allowing exact localization of cells in three dimensions, and in time. Individual cell track length and  
701 net displacement were measured in signaling center and oral epithelial cells. The distribution of cell  
702 trajectory displacement angles was analyzed with the Rayleigh test ( $H_0$ =random,  $p>0.05$ ). For IK  
703  $G_1/G_0$  group and pairwise cell trajectory analysis tissues were live imaged E11.5+12h.  $G_1/G_0$  cells  
704 were divided into neighboring groups in their original position and traced to the end position. Cells  
705 within close proximity of each other ( $\leq 15\mu\text{m}$ ) were analyzed in pairs. For the analysis on decay of  
706 cellular persistence in directional migration, we first determined the angle of cell migration during  
707 the first hour of observation for the initial orientation of the cells. At each following time point, cells  
708 that had not yet turned  $> \pm 90^\circ$  from their starting angle, were considered directionally persistent.

709 **Supplemental Figure Legends**

710 **Related to Figure 1.**

711 **Figure S1. Mandible explants grown *in vitro* show same cell behavioral and morphogenetic**  
712 **developmental patterns as in *in vivo***

713 For functional live tissue imaging analyses we first verified that cultured explants developed, in  
714 respect to G<sub>1</sub>/G<sub>0</sub> cell population dynamics and bud growth, comparably to *in vivo* development. (A)  
715 Quantification of G<sub>1</sub>/G<sub>0</sub> cells in the developing molar placode and bud *in vivo* (embryos N<sub>E11.5</sub>=7,  
716 N<sub>E12.5</sub>=11, N<sub>E13.0</sub>=4 N<sub>E13.5</sub>=5, error bars±SEM). (B) Confocal fluorescence images of mouse  
717 embryonic mandible explants at E12.5 and grown *ex vivo* in a Trowell culture setup for 8h, 22h or  
718 28h. Fucci fluorescent cell cycle indicator G<sub>1</sub>/G<sub>0</sub> (Fucci G1)(red), K17-GFP epithelial placode/bud  
719 marker and immunofluorescence staining for a pan-epithelial marker EpCam (grey), epithelium  
720 (dotted line). Explants show similar morphogenesis to *in vivo* with a slight lag in timing. (C)  
721 Quantification of G<sub>1</sub>/G<sub>0</sub> cells in the developing molar placode and bud *in vitro* in cultured explants  
722 (embryos N<sub>E12.5+8h</sub>=2, N<sub>E12.5+24h</sub>=8, N<sub>E12.5+27h</sub>=7, mean±SEM) (D) Quantification of Shh-GFP cells in  
723 the IK and emerging pEK *in vivo* (embryos N<sub>E11.5</sub>=4, N<sub>E12.5</sub>=11, N<sub>E13.0</sub>=3 N<sub>E13.5</sub>=5, error bars±SEM).  
724 (E) Fucci G<sub>1</sub>/G<sub>0</sub> fluorescence images overlaid with whole-mount DIG *in situ* hybridization with a  
725 probe specific for *Shh*. Molar IK G<sub>1</sub>/G<sub>0</sub> focus (arrowhead), emerging pEK (asterisk).

726 **Related to Figure 2.**

727 **Figure S2. Tooth epithelial cell populations contribute differentially to the growing bud**

728 (A) IK cells remain an integral part of the developing early molar bud. Graph shows the distribution  
729 of individual IK  $G_1/G_0$  cells (cell tracks in dark grey) and emerging pEK cells (cell tracks in light  
730 grey) to the growing bud imaged from E12.5 up to 16h (image z-stacks taken at 20min intervals).  
731 Color scale represents borders of the growing tooth bud visualized with K17-GFP. (B) Quantification  
732 of S/ $G_2$ /M cell number in developing molars *in vivo* ( $N_{E11.5}=7$ ,  $N_{E12.5}=8$ ,  $N_{E13.0}=4$ ,  $N_{E13.5}=5$ ,  
733 mean $\pm$ SD) was similar to explants grown *ex vivo* ( $N_{E12.5+8h}=4$ ,  $N_{E12.5+22h}=7$ ,  $N_{E12.5+28h}=4$ , mean $\pm$ SD).  
734 (C) Quantification of molar bud dimensions *in vivo* (black bars) and *ex vivo* cultured explants (white  
735 bars) Dimensions in width and length were similar *in vivo* and cultured specimens with somewhat  
736 flatter bud after culturing ( $N_{E11.5}=5$ ,  $N_{E12.5}=11$ ,  $N_{E13.0}=4$ ,  $N_{E13.5}=5$ ,  $N_{E12.5+8h}=4$ ,  $N_{E12.5+22h}=10$ ,  
737  $N_{E12.5+28h}=7$ , mean $\pm$ SD). (D) Quantification of cell cycle phases in oral epithelial cells of Fucci  $G_1/G_0$   
738 and S/ $G_2$ /M whole mount live imaging samples from E11.5+12h ( $N=5$ , mean $\pm$ SEM) and E12.5+12h  
739 ( $N=3$ , mean $\pm$ SEM). (E) Surface rendering composite still image of a live tissue whole mount time  
740 lapse E11.5+12h. Tracing the contribution of individual  $G_1/G_0$  and S/ $G_2$ /M cells originating from  
741 various positions in the bud,  $G_1/G_0$  (red), S/ $G_2$ /M (green) and cell divisions (white numbers).  
742 Divisions (where cytokinesis was observed) in surface rendering shown mother and daughter cells  
743 respectively color coded. Line graph shows the contribution of individual  $G_1/G_0$  and S/ $G_2$ /M cells to  
744 the molar from E11.5+12h. (F) Surface rendering composite still image of a live tissue whole mount  
745 time lapse E12.0+12h and line graph showing the contribution of individual  $G_1/G_0$  and S/ $G_2$ /M cells.

746 **Related to Figure 2.**

747 **Figure S3. Shh is involved in bud proliferation and inhibition of Hh or Fgf signaling**  
748 **suppresses invagination**

749 (A) Confocal fluorescence images of Fucci  $G_1/G_0$ , S/ $G_2/M$  whole mount explants cultured  
750 E11.5+24h. Samples were treated with cyclopamine for inhibition of Shh signaling, or vehicle (Ctrl).  
751 Fucci  $G_1/G_0$  (red) S/ $G_2/M$  (green) and epithelial EpCam immunofluorescence staining (white). At  
752 E11.5, at the start of treatment the IK was emerging. After 24h in culture the control showed  
753 invagination with S/ $G_2/M$  cells in the bud adjacent to the IK distally. Cyclopamine treatment resulted  
754 in an expansion of  $G_1/G_0$  phase cells and reduced proliferation adjacent to the IK. (B) Fucci whole  
755 mount explants cultured E11.5+24h. Samples were treated with an FGFR inhibitor (SU5420) or  
756 vehicle (Ctrl). After 24h of treatment with SU5402, some proliferative cells were present but there  
757 was an increase in  $G_1/G_0$  phase cells particularly in the basal population (arrows). (C) Quantification  
758 of bud depth (fold change over start of the treatment) in E11.5+24h samples treated with cyclopamine  
759 or SU5402 ( $N_{\text{cyclo}}=6$ ,  $N_{\text{SU5402}}=4$ , mean $\pm$ SEM, Mann Whitney U,  $p\leq 0.01^{**}$ ,  $p\leq 0.001^{***}$ ). (D)  
760 Quantification of  $G_1/G_0$  and S/ $G_2/M$  cells in the bud (N in all groups=5, mean $\pm$ SEM, Mann Whitney  
761 U,  $p\leq 0.01^{**}$ ).

762 **Related to Figure 3.**

763 **Figure S4. Microsurgical removal of the IK abrogates molar bud growth**

764 Confocal fluorescence images of Fucci  $G_1/G_0$  (red) whole mount explant cultures, EpCam  
765 immunofluorescence staining (white, epithelium marked with a dotted line), nuclei Hoechst (blue).  
766 (A) The molar epithelial placode was microsurgically removed at E11.5 and the tissue cultured for  
767 24h. No  $G_1/G_0$  condensate was present in the diastema and the epithelium remained flat while the  
768 control bud invaginated normally. (B) Microsurgical removal of the IK at E12.5 similarly arrested  
769 molar growth. The control side development proceeded normally to bud stage with the emerging pEK  
770 present. (C) Quantification of epithelial bud depth on the control side compared to epithelium depth  
771 in the respective area on the side where the IK was microsurgically removed in E11.5+24h and  
772 E12.5+24h explants ( $N_{E11.5+24h}=8$ ,  $N_{E12.5+24h}=7$ , mean $\pm$ SEM, Mann Whitney U,  $p\leq 0.05^*$ ,  $p\leq 0.01^{**}$ )



773 **Related to Figure 6.**

774 **Figure S5. Apoptosis as a silencing mechanism of the molar IK signaling center**

775 (A) Whole mount confocal fluorescence images of Fucci  $G_1/G_0$  (red), cleaved caspase 3  
776 immunofluorescence staining for apoptotic cells (Casp3, green). Epithelial bud (dotted line), IK  
777 (arrowhead) and presumptive pEK (asterisk), volume rendering from side view of molar. (B)  
778 Quantification of Casp3+ nuclei in the molar IK (N=12, mean $\pm$ SEM).

779 **Related to Figure 7.**

780 **Figure S6. Apoptosis as a silencing mechanism of the molar IK signaling center**

781 (A) Quantification of bud length and IK G<sub>1</sub>/G<sub>0</sub> cell density (fold change over start of the treatment)  
782 in E11.5+16h samples with a recombinant Wnt10b protein releasing or control bead close to the IK  
783 distally on the lingual side of the placode compared to control (N=10, mean±SEM, Mann Whitney  
784 U,  $p \leq 0.05^*$ ). (B) Confocal fluorescence images of Fucci G<sub>1</sub>/G<sub>0</sub> (red), S/G<sub>2</sub>/M (green) whole mount  
785 explant cultures, EpCam immunofluorescence staining (white, epithelium marked with a dotted line),  
786 bead (closed circle). (C) Quantification of S/G<sub>2</sub>/M cells at E11.5+16h (fold change over start of the  
787 treatment) in Wnt10b bead treated molar buds compared to untreated control buds (N=6, mean±SEM,  
788 Mann Whitney U,  $p \leq 0.05^*$ ).

789 **Supplemental Movie Legends**

790 **Related to Figure 2.**

791 **Movie S1. Tracking individual cell G1 and S/G2/M fates in a Fucci cell cycle reporter E11.5+12h**  
792 **molar placode by live tissue confocal imaging shows placode IK cells stay in G1 phase**

793 Fluorescence confocal microscopy time-lapse of an embryonic mouse E11.5 whole-mount mandible  
794 explant imaged for 12h. Image stacks were taken at 20min intervals, and the playback speed here is  
795 five frames per second. The tracking of individual cell fates from the placode stage is shown as a  
796 surface rendering of the Fucci cell cycle indicator: the contribution of individual G<sub>1</sub>/G<sub>0</sub> phase cells in  
797 the placode and initiation knot are shown color coded in red hues and S/G<sub>2</sub>/M cells in green.  
798 Individual cell divisions of mother cells and their daughters are color coded in blue, green and yellow  
799 shades, respectively. IK G<sub>1</sub>/G<sub>0</sub> cells in the placode did not re-enter the cell cycle. In contrast  
800 neighboring cells, distally from the IK, frequently entered S/G<sub>2</sub>/M phase and cell divisions  
801 contributed to invagination locally.

802 **Related to Figure 2.**

803 **Movie S2. The IK remains an integral part of the growing tooth bud as shown in Fucci cell**  
804 **cycle reporter E12.0+12 h molars by confocal live tissue imaging**

805 Fluorescence confocal microscopy time-lapse of a Fucci cell cycle indicator E12.0 whole-mount  
806 mandible explant imaged for 12h. Image stacks were taken at 20min intervals, and the playback speed  
807 here is five frames per second. The tracking of individual cell fates during the early bud invagination,  
808 is shown as a surface rendering:  $G_1/G_0$  phase cells are shown in red hues and  $S/G_2/M$  cells in green.  
809 Individual cell divisions of mother cells and their daughters are color coded in blue, green and yellow  
810 shades, respectively. IK cells remained in  $G_1/G_0$  phase and remained an integral part of the growing  
811 tooth.  $S/G_2/M$  phase cells and cell divisions in both basal and suprabasal populations contributed to  
812 invagination and growth throughout the bud.

813 **Related to Figure 4.**

814 **Movie S3. Live imaging of Fucci cell cycle reporter shows that IK cells rearrange dynamically**  
815 **in the E11.5+12h molar placode**

816 Fluorescence confocal microscopy time-lapse of an embryonic mouse E11.5 whole-mount mandible  
817 explant imaged for 12h, showing the contribution of cell cycle stages to molar placode and initial  
818 budding morphogenesis on a high single cell resolution. Image stacks were taken at 20min intervals,  
819 and the playback speed here is five frames per second. The movie shows a volume rendering of cell  
820 cycle indicator Fucci G<sub>1</sub>/G<sub>0</sub> nuclei (red) and S/G<sub>2</sub>/M (green). First, an overview of the mandible at  
821 the start of imaging seen from the mesenchymal side toward the epithelium, then a close up of the  
822 developing molar placode (IK, open circle) followed by both channels merged and separately.  
823 Individual cell tracks are shown as a dragon tail rendering showing a subset of twenty subsequent  
824 points in each track, IK G<sub>1</sub>/G<sub>0</sub> (red), S/G<sub>2</sub>/M (green). The IK G<sub>1</sub>/G<sub>0</sub> cells moved toward the mesial  
825 front area of the bud. The IK cells stayed in G<sub>1</sub>/G<sub>0</sub> phase and drove proliferation locally in the  
826 adjacent cells, posterior to the knot, to initiate the invagination of the epithelium. The bud S/G<sub>2</sub>/M  
827 cells showed little movement.

828 **Related to Figures 3, 4 and 6.**

829 **Movie S4. Live imaging shows TCF/Lef:H2B-GFP and Fucci G1 marker expressing cells are**  
830 **closely juxtaposed and exhibit differential movement patterns in E11.5+12h molar placodes**

831 Fluorescence confocal microscopy time-lapse of E11.5+12h Fucci G<sub>1</sub>/G<sub>0</sub> and TCF/Lef:H2B-GFP  
832 reporters. Image stacks were taken at 20min intervals, and the playback speed here is five frames per  
833 second. The movie shows a volume rendering of Fucci G<sub>1</sub>/G<sub>0</sub> nuclei (red) and TCF/Lef:H2B-GFP  
834 canonical Wnt signaling reporter (green). First an overview of the mandible at the start of imaging  
835 seen from the mesenchymal side toward the epithelium, then a close up of the developing molar  
836 placode (IK, open circle) followed by both channels merged and separately. Individual cell tracks are  
837 shown as a dragon tail rendering showing a subset of ten subsequent points in each track, IK G<sub>1</sub>/G<sub>0</sub>  
838 (red), TCF/Lef:H2B-GFP (green), both reporters (yellow). The molar placode IK G<sub>1</sub>/G<sub>0</sub> cells  
839 specifically localized to the peripheral border formed by dental lamina cells with high TCF/Lef:H2B-  
840 GFP reporter expression (Wnt<sup>Hi</sup> cells). Increasing numbers of G<sub>1</sub>/G<sub>0</sub> cells were recruited to the IK  
841 with directional movement, toward the dental lamina Wnt<sup>Hi</sup> cells. Dental lamina Wnt<sup>Hi</sup> cells remained  
842 mostly localized.

843 **Related to Figures 3 and 4**

844 **Movie S5. Live imaging of E12.5+12h Fucci reporter shows that IK G1 cells do not contribute**  
845 **clonally to the primary EK in the molar**

846 Fluorescence confocal microscopy time-lapse of E12.5+12h Fucci explant, showing the contribution  
847 of cell cycle stages at bud stage and initiation of the pEK. Image stacks were taken at 20min intervals,  
848 and the playback speed here is five frames per second. The movie shows volume rendering of Fucci  
849 G<sub>1</sub>/G<sub>0</sub> nuclei (red) and S/G<sub>2</sub>/M (green) overview of the mandible at the start of imaging (initial molar  
850 bud outlined white). In the close up of the molar IK is marked with an open circle and the location  
851 where the pEK will be initiated (marked with a closed circle). Time lapse shows volume rendering of  
852 both channels merged and separately. In track view the perimeter of the mature bud is outlined in  
853 white. Individual cell tracks are shown as a dragon tail rendering showing a subset of ten subsequent  
854 points in each track, IK G<sub>1</sub>/G<sub>0</sub> (red), pEK G<sub>1</sub>/G<sub>0</sub> (magenta), S/G<sub>2</sub>/M (green). A wave of cell  
855 proliferation contributed to rapid bud growth while the IK cells stayed in G<sub>1</sub>/G<sub>0</sub> in the mesial part of  
856 the bud. The pEK G<sub>1</sub>/G<sub>0</sub> cells were initiated *de novo* deep in the tip of the invaginating bud with no  
857 clonal contribution from the IK.

858 **Related to Figures 4.**

859 **Movie S6. Live imaging of Fucci and TCF/Lef:H2B-GFP reporters shows independent IK and**  
860 **pEK signaling centers regulating morphogenesis in E12.5+12h molar**

861 Fluorescence confocal microscopy time-lapse of Fucci G<sub>1</sub>/G<sub>0</sub> and TCF/Lef:H2B-GFP E12.5+12h  
862 whole mount explant. The movie shows volume rendering of Fucci G<sub>1</sub>/G<sub>0</sub> nuclei (red) and  
863 TCF/Lef:H2B-GFP canonical Wnt signaling reporter (green) visualizing the IK and emerging pEK  
864 signaling centers. Image stacks were taken at 20 min intervals, and the playback speed here is five  
865 frames per second. An overview of a volume rendering of the mandible at the start of imaging shows  
866 both channels merged and the molar bud is outlined in white. In close up view of the molar IK position  
867 is marked with an open circle and the location where the pEK is later initiated is marked with a closed  
868 circle. Time lapse shows volume rendering of both channels merged and separately. In track view the  
869 perimeter of the mature bud is outlined in white. Individual cell tracks are shown as a dragon tail  
870 rendering showing a subset of ten subsequent points in each track, IK G<sub>1</sub>/G<sub>0</sub> (red), pEK G<sub>1</sub>/G<sub>0</sub>  
871 (magenta), high intensity TCF/Lef:H2B-GFP (Wnt<sup>Hi</sup>, green), double positive (Wnt<sup>Hi</sup>+ Fucci G<sub>1</sub>/G<sub>0</sub>,  
872 yellow). Initially at E12.5, Wnt<sup>Hi</sup> cells surrounded the G<sub>1</sub> cells in the IK. TCF/Lef:H2B-GFP positive  
873 cells appeared throughout the bud with increase in signal intensity in the prospective pEK region  
874 followed by emergence of first G<sub>1</sub> cells. Tracking of individual G<sub>1</sub>/G<sub>0</sub>, Wnt<sup>Hi</sup>, and double positive  
875 cells showed that none of these cell populations from the IK contributed clonally to the pEK; the  
876 Wnt<sup>Hi</sup> and G<sub>1</sub>/G<sub>0</sub> cells in the pEK region appeared *de novo*.



Figure 1.

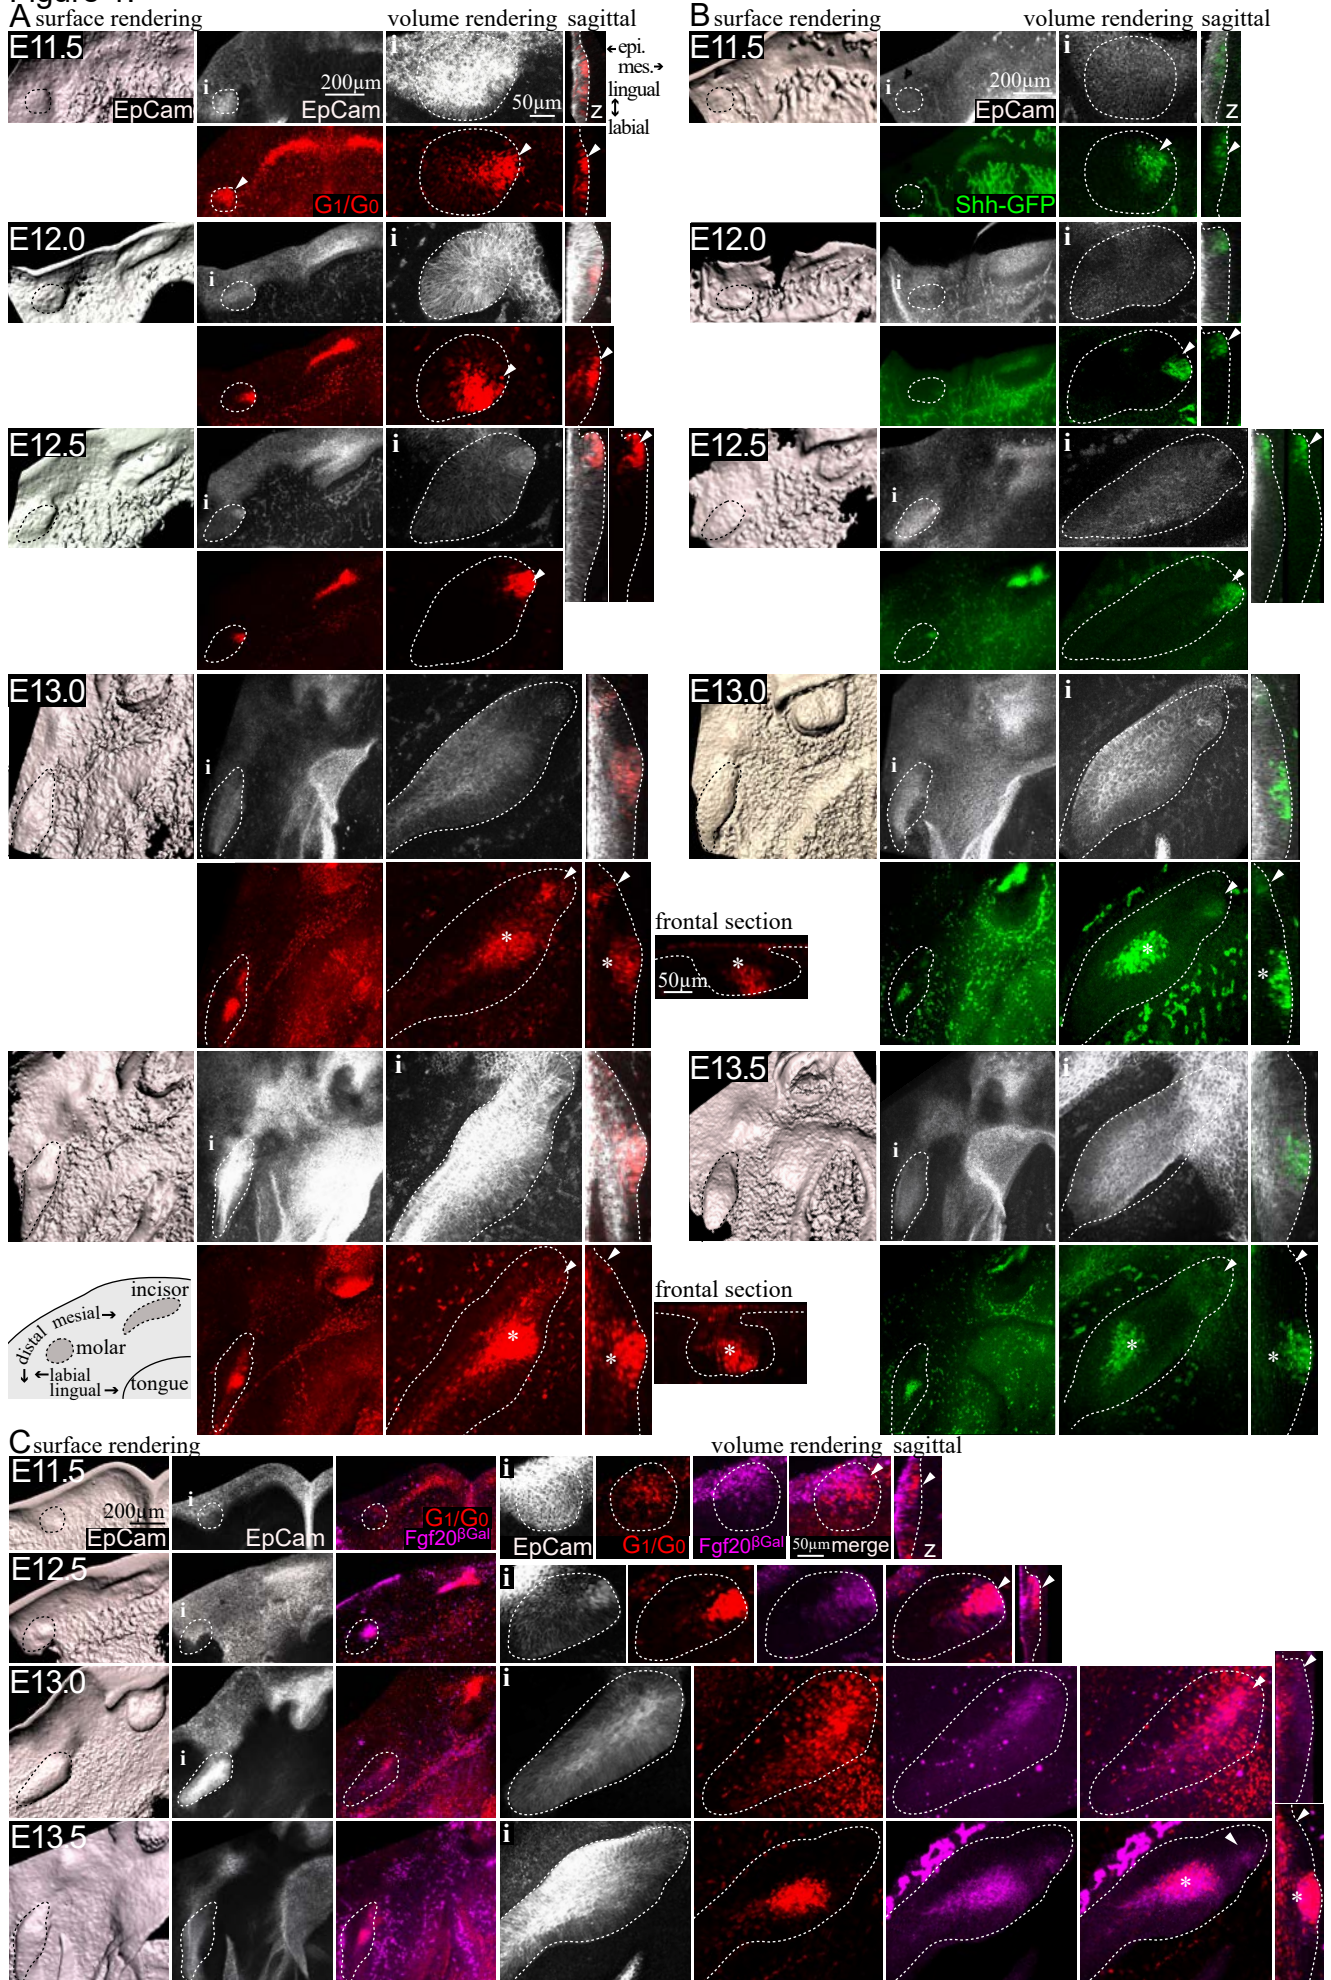

Figure 2.

**A** Live confocal imaging

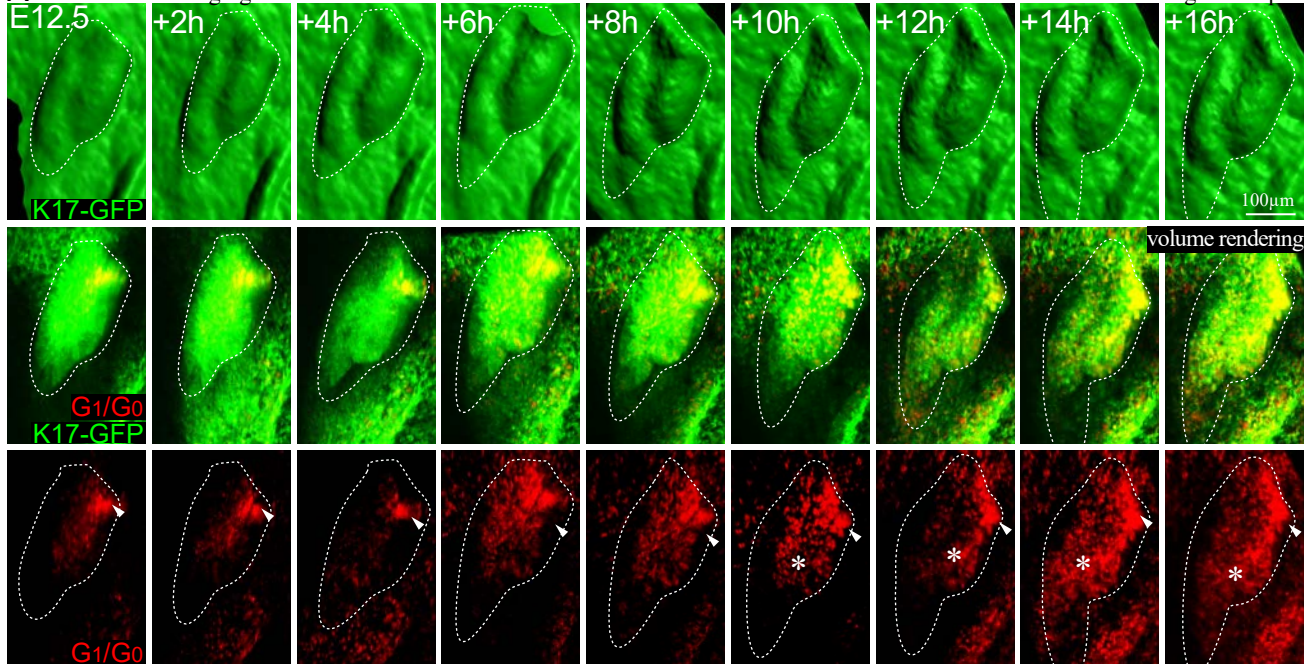

**B** volume rendering

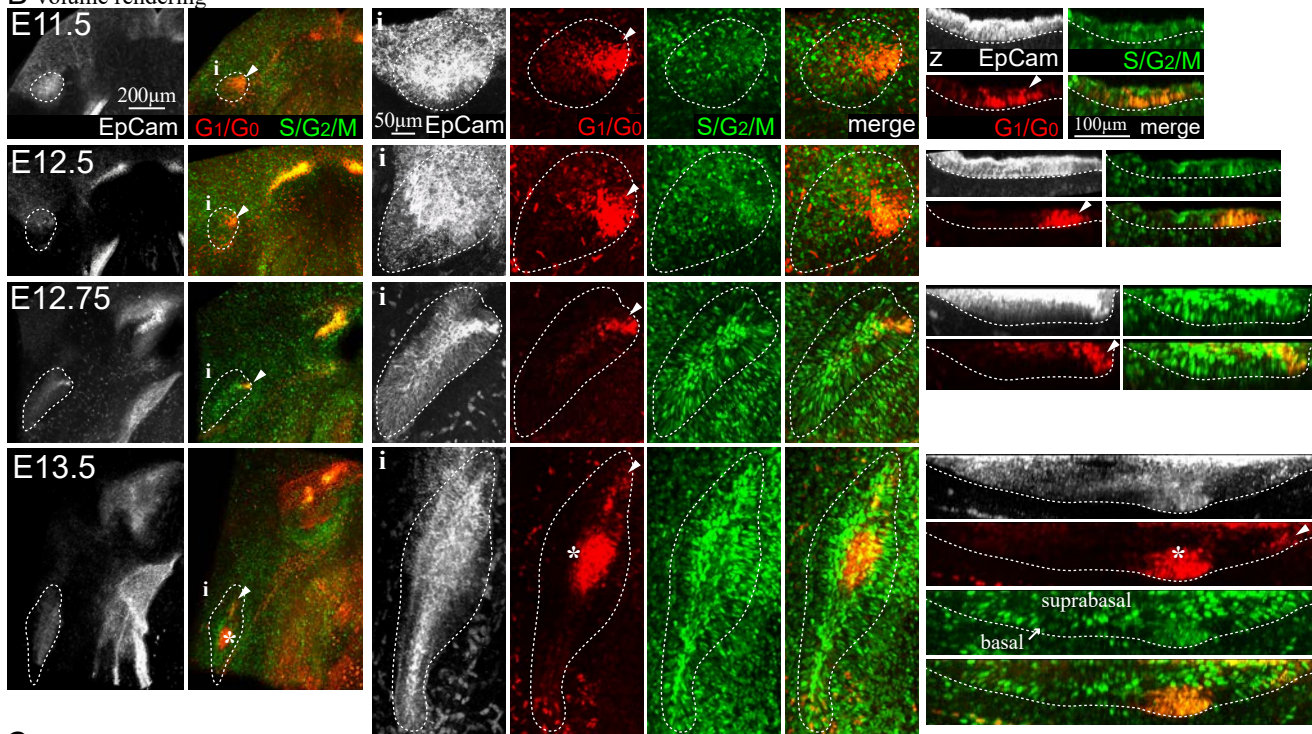

**C**

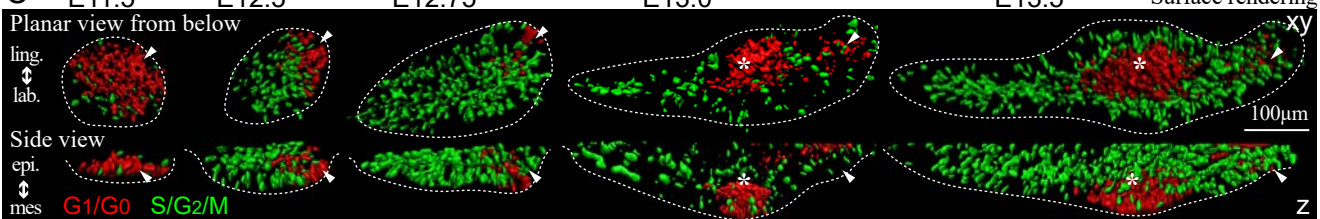

**D**

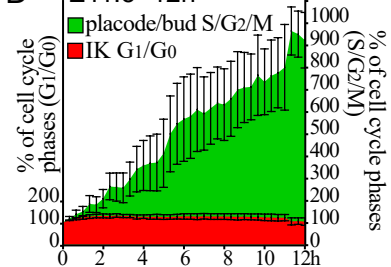

**E**

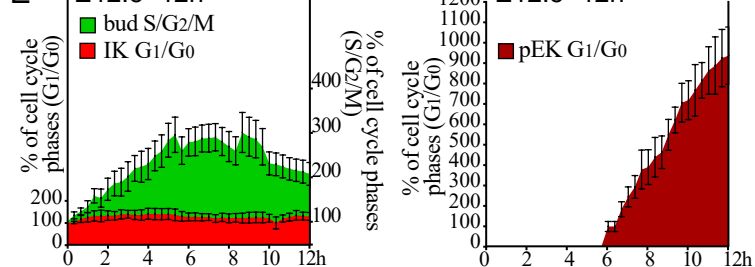

Figure 3.

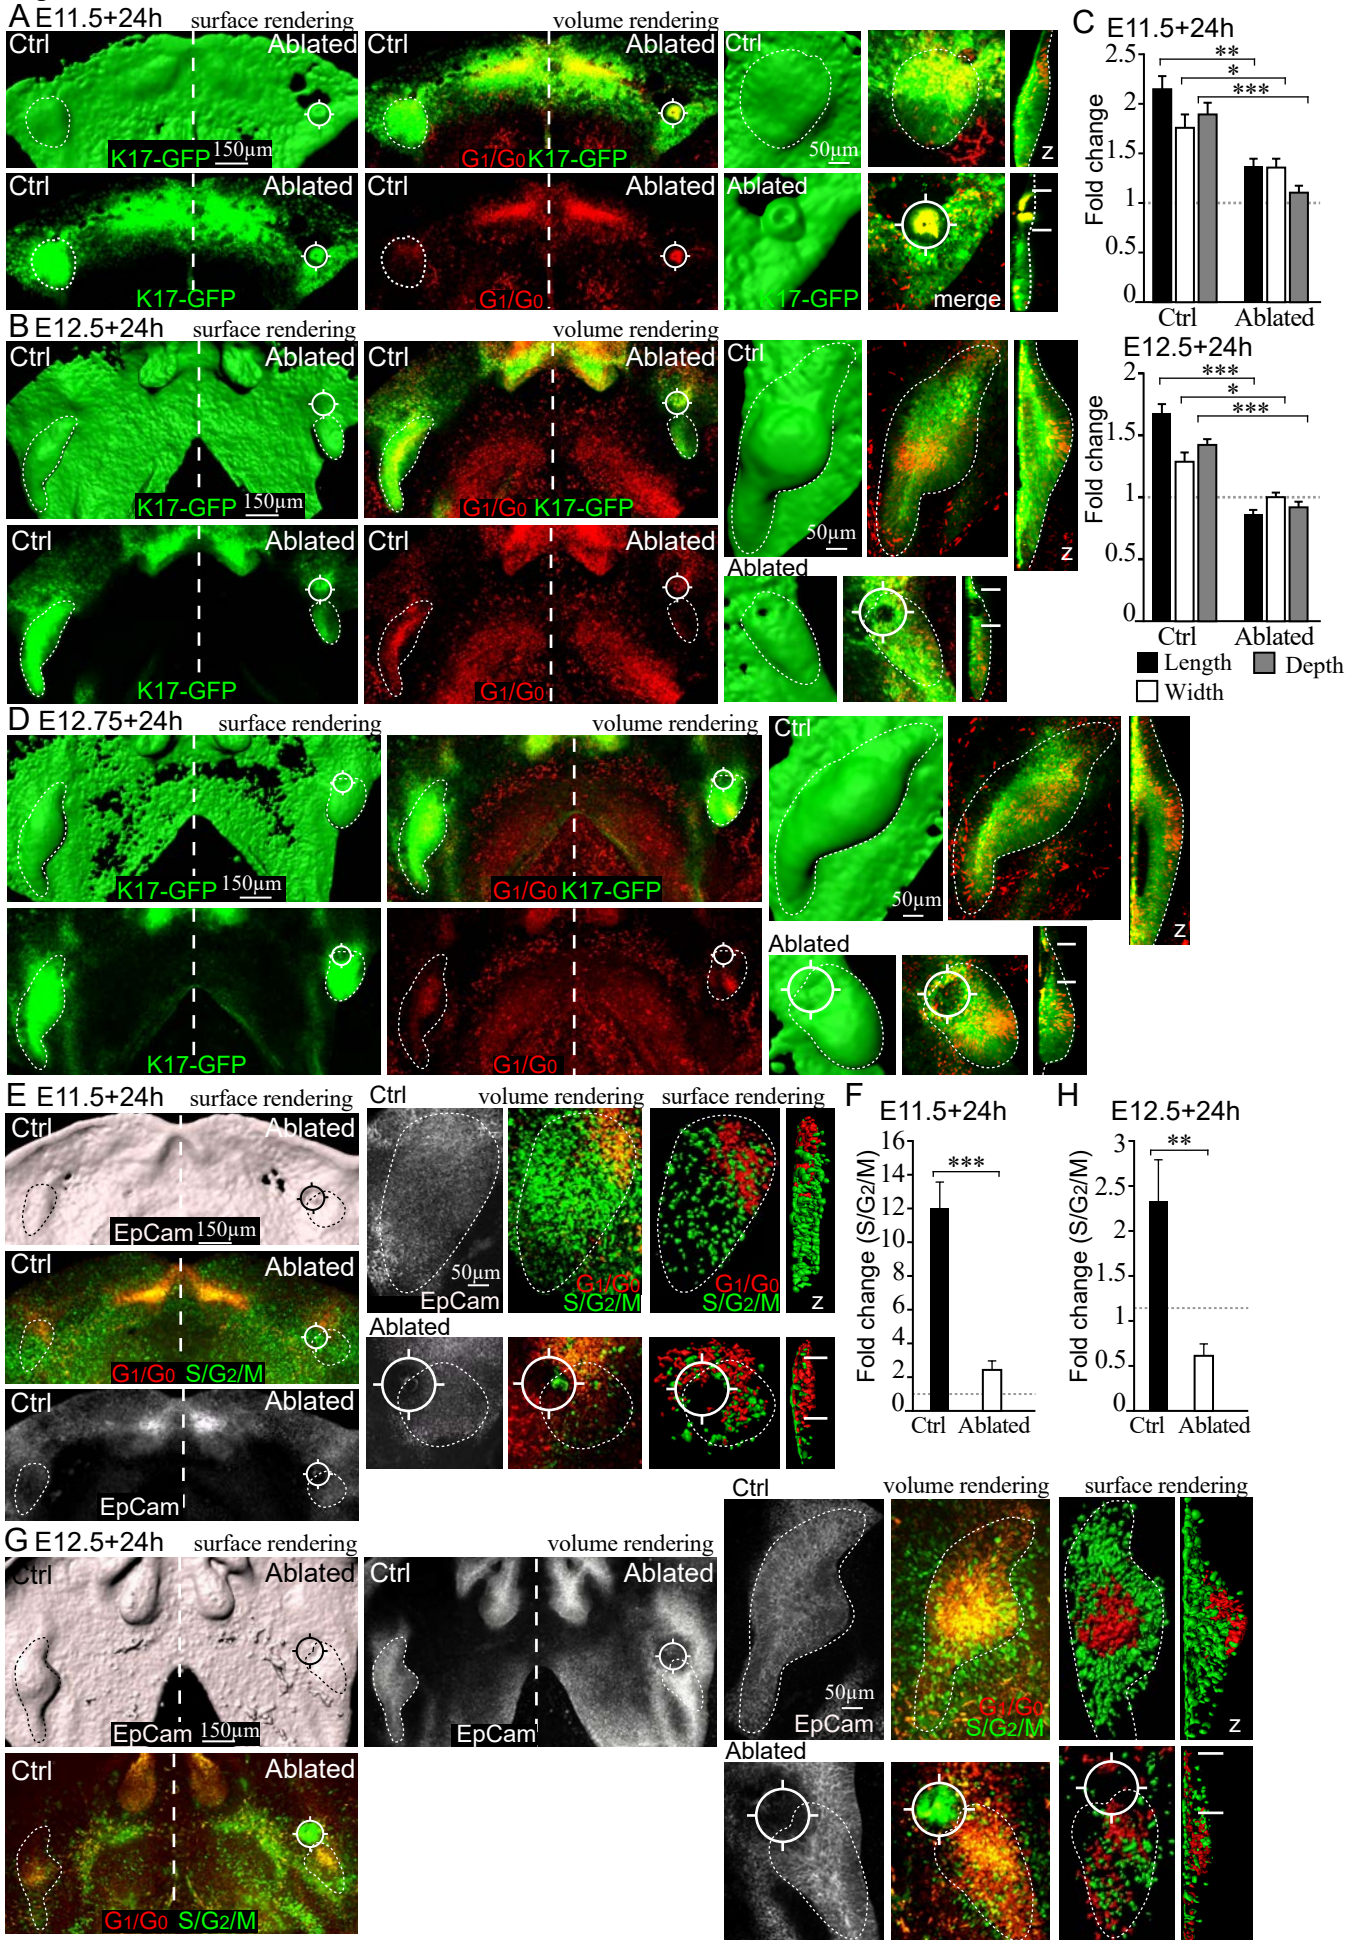

Figure 4.

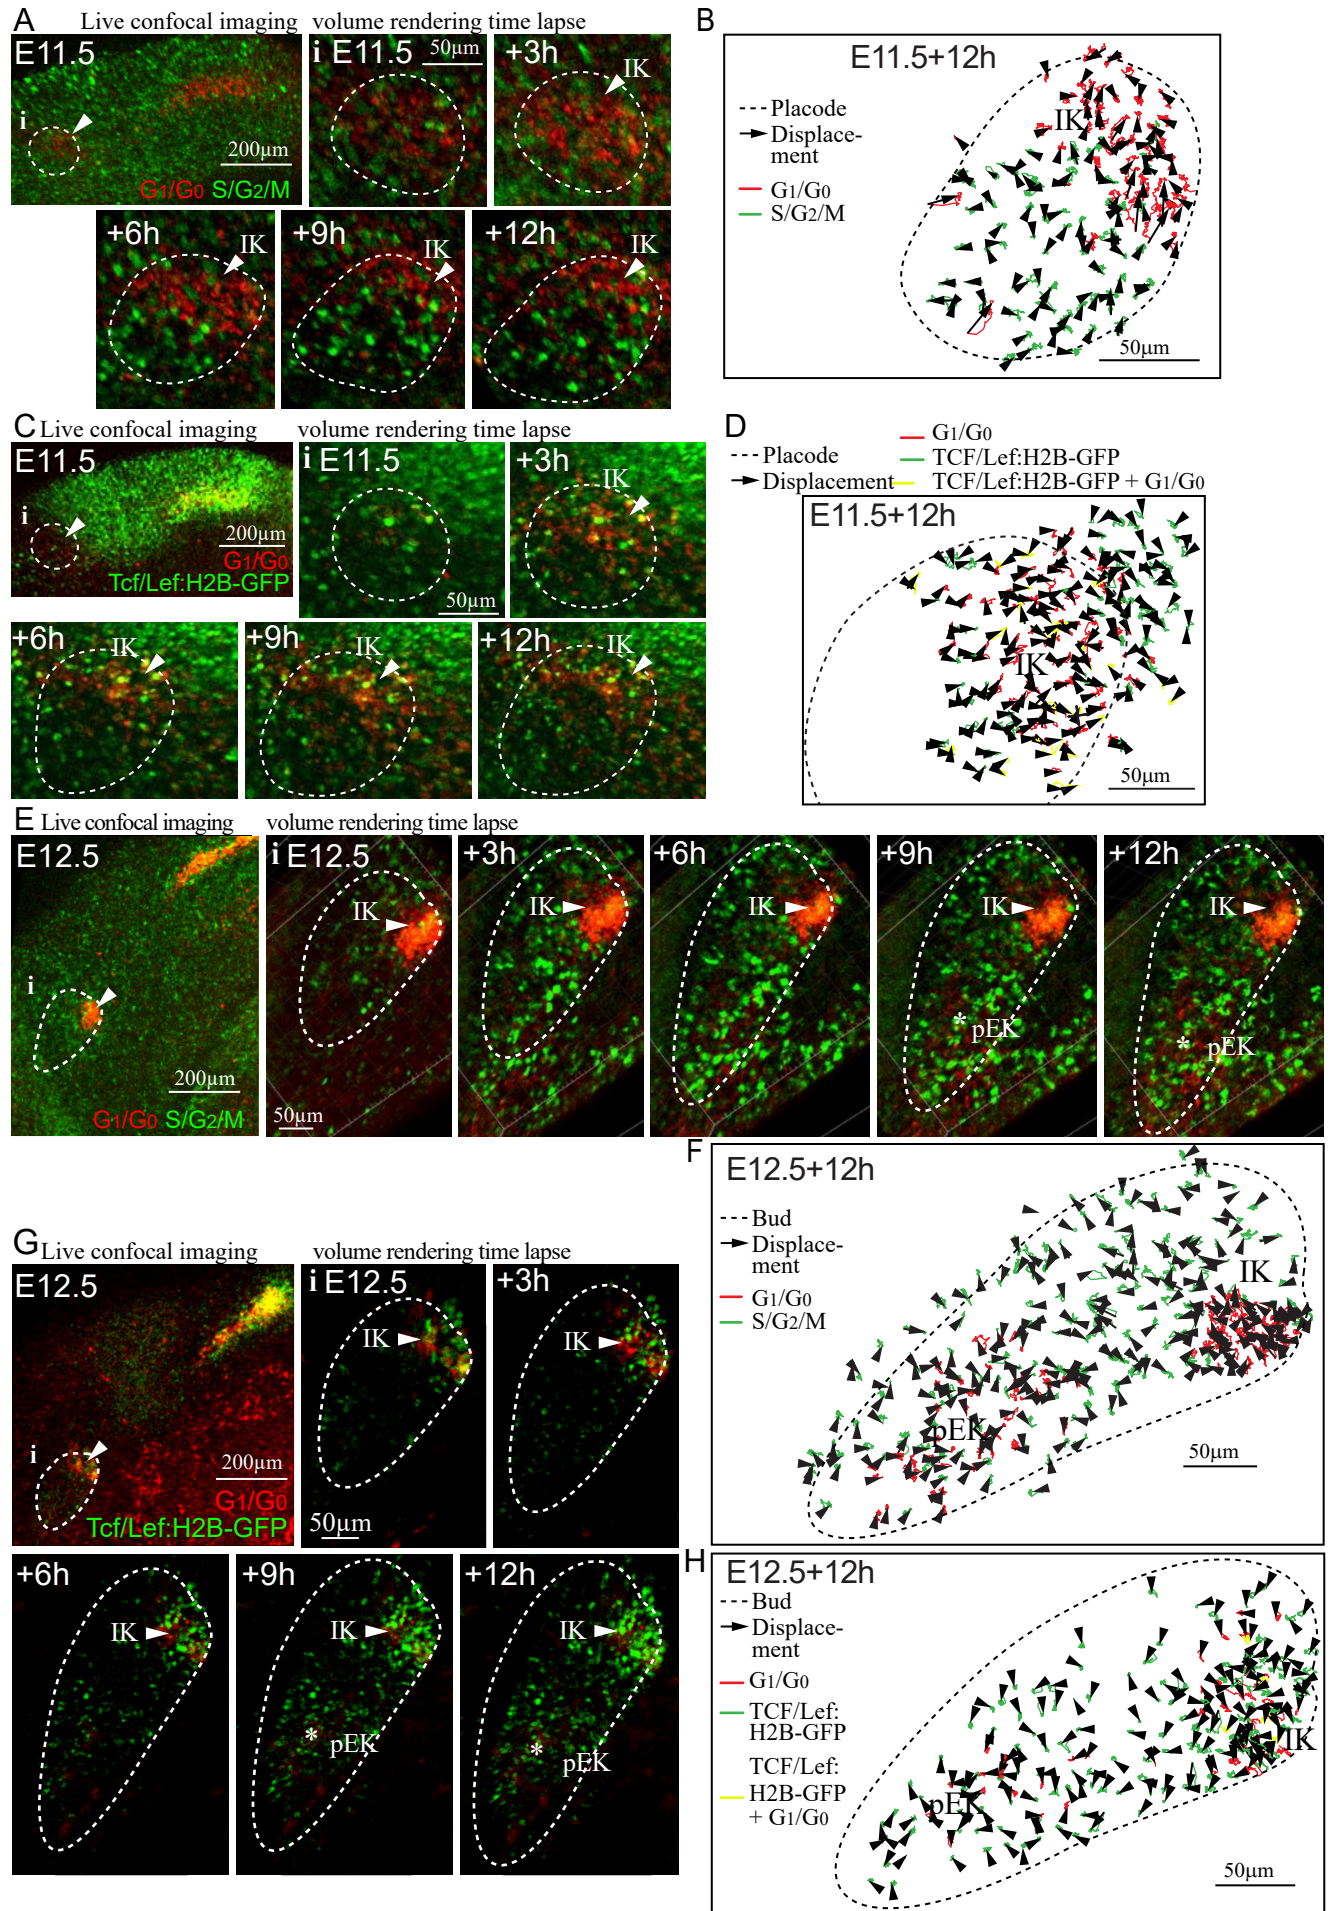

Figure 5.

A optical section

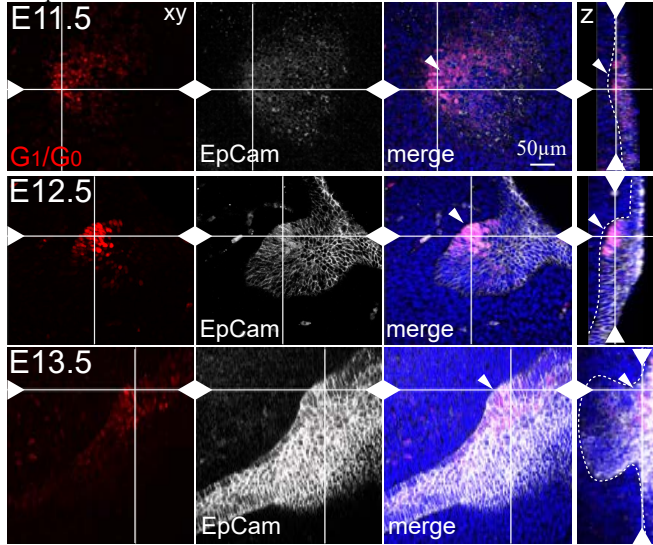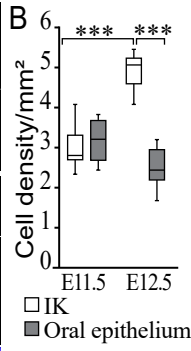

C □ Tooth ■ Oral epithelium

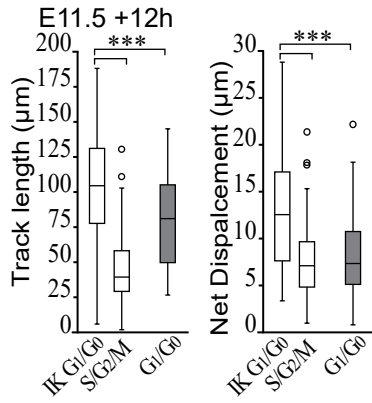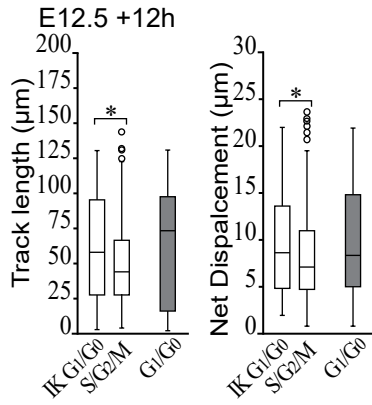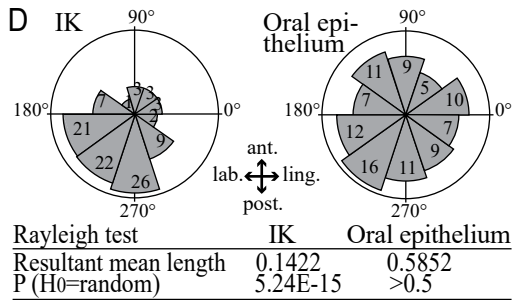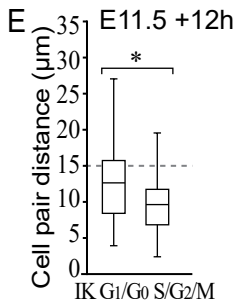

F E11.5 + 12h

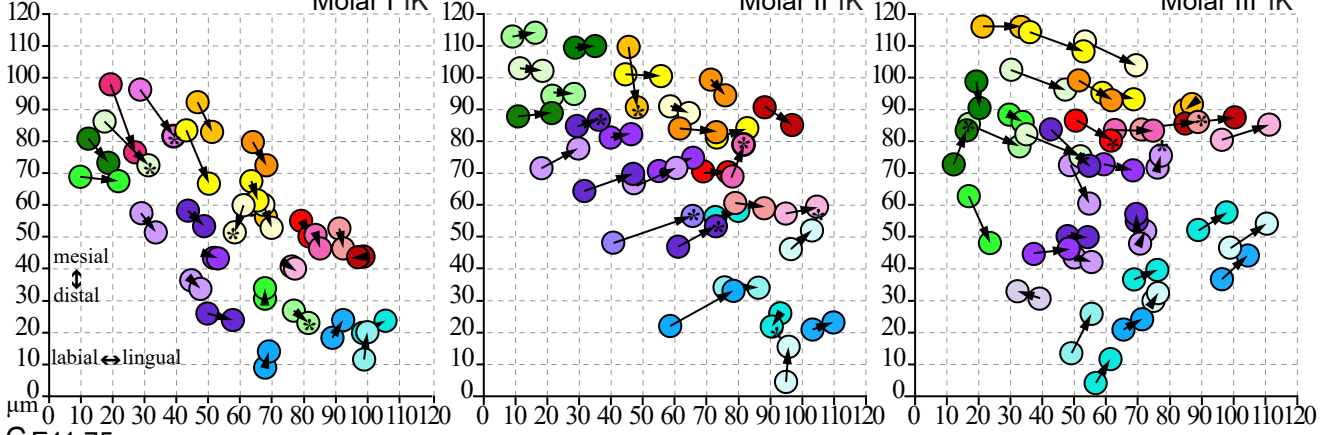

G E11.75

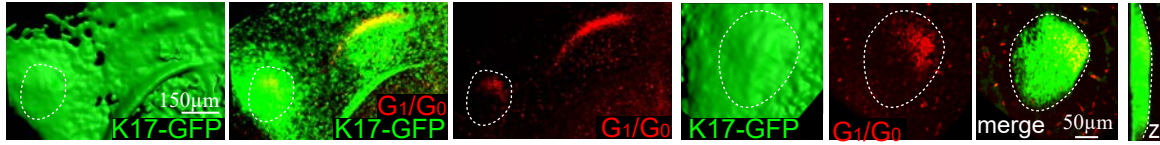

E11.75+24h

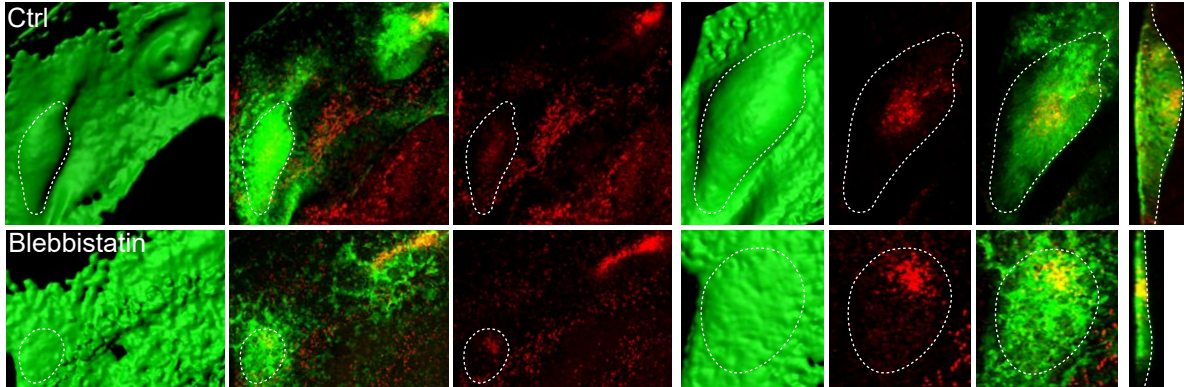

Figure 6.

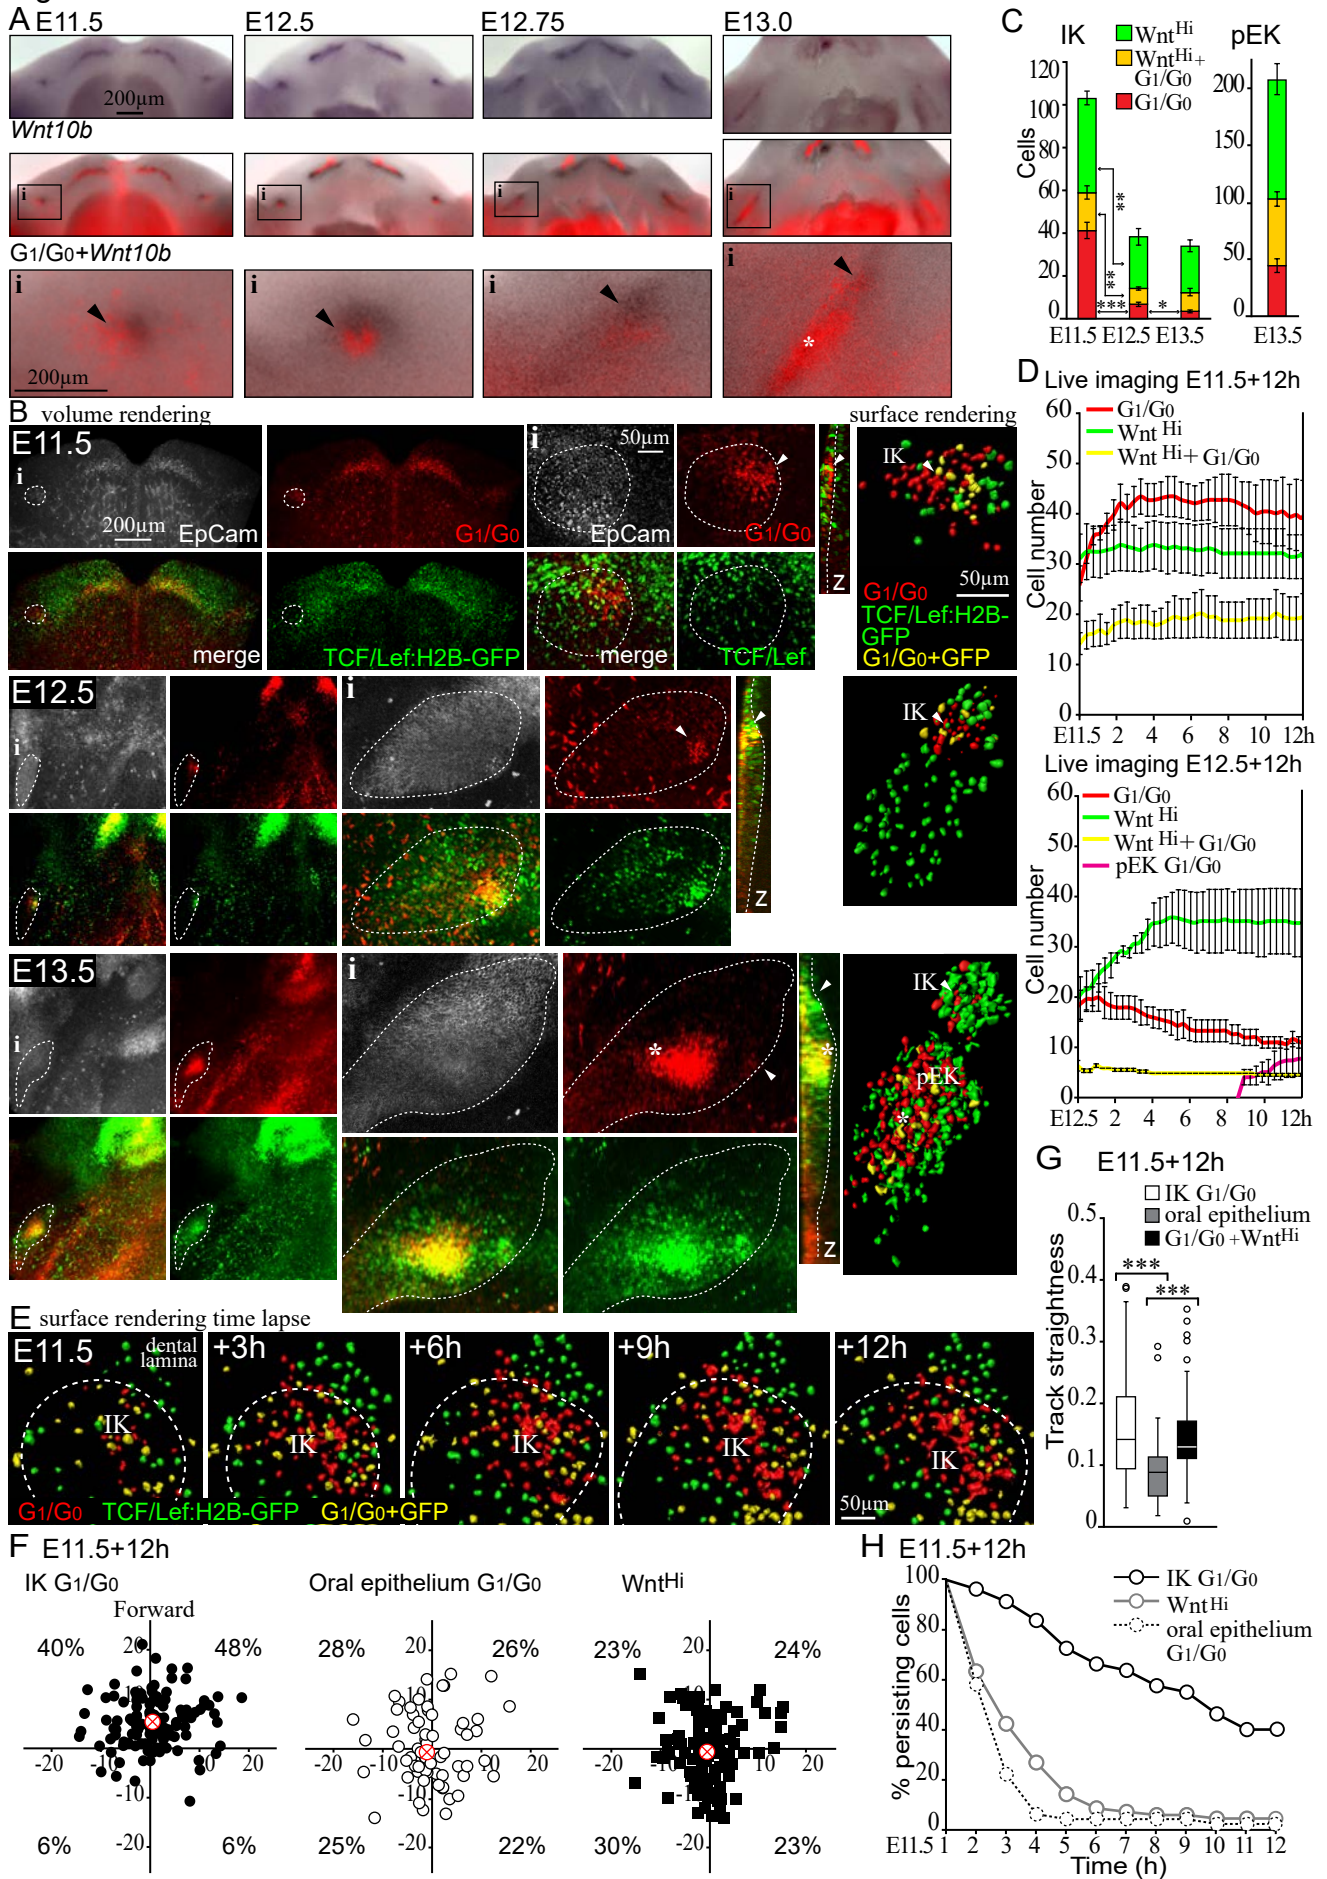

Figure 7.

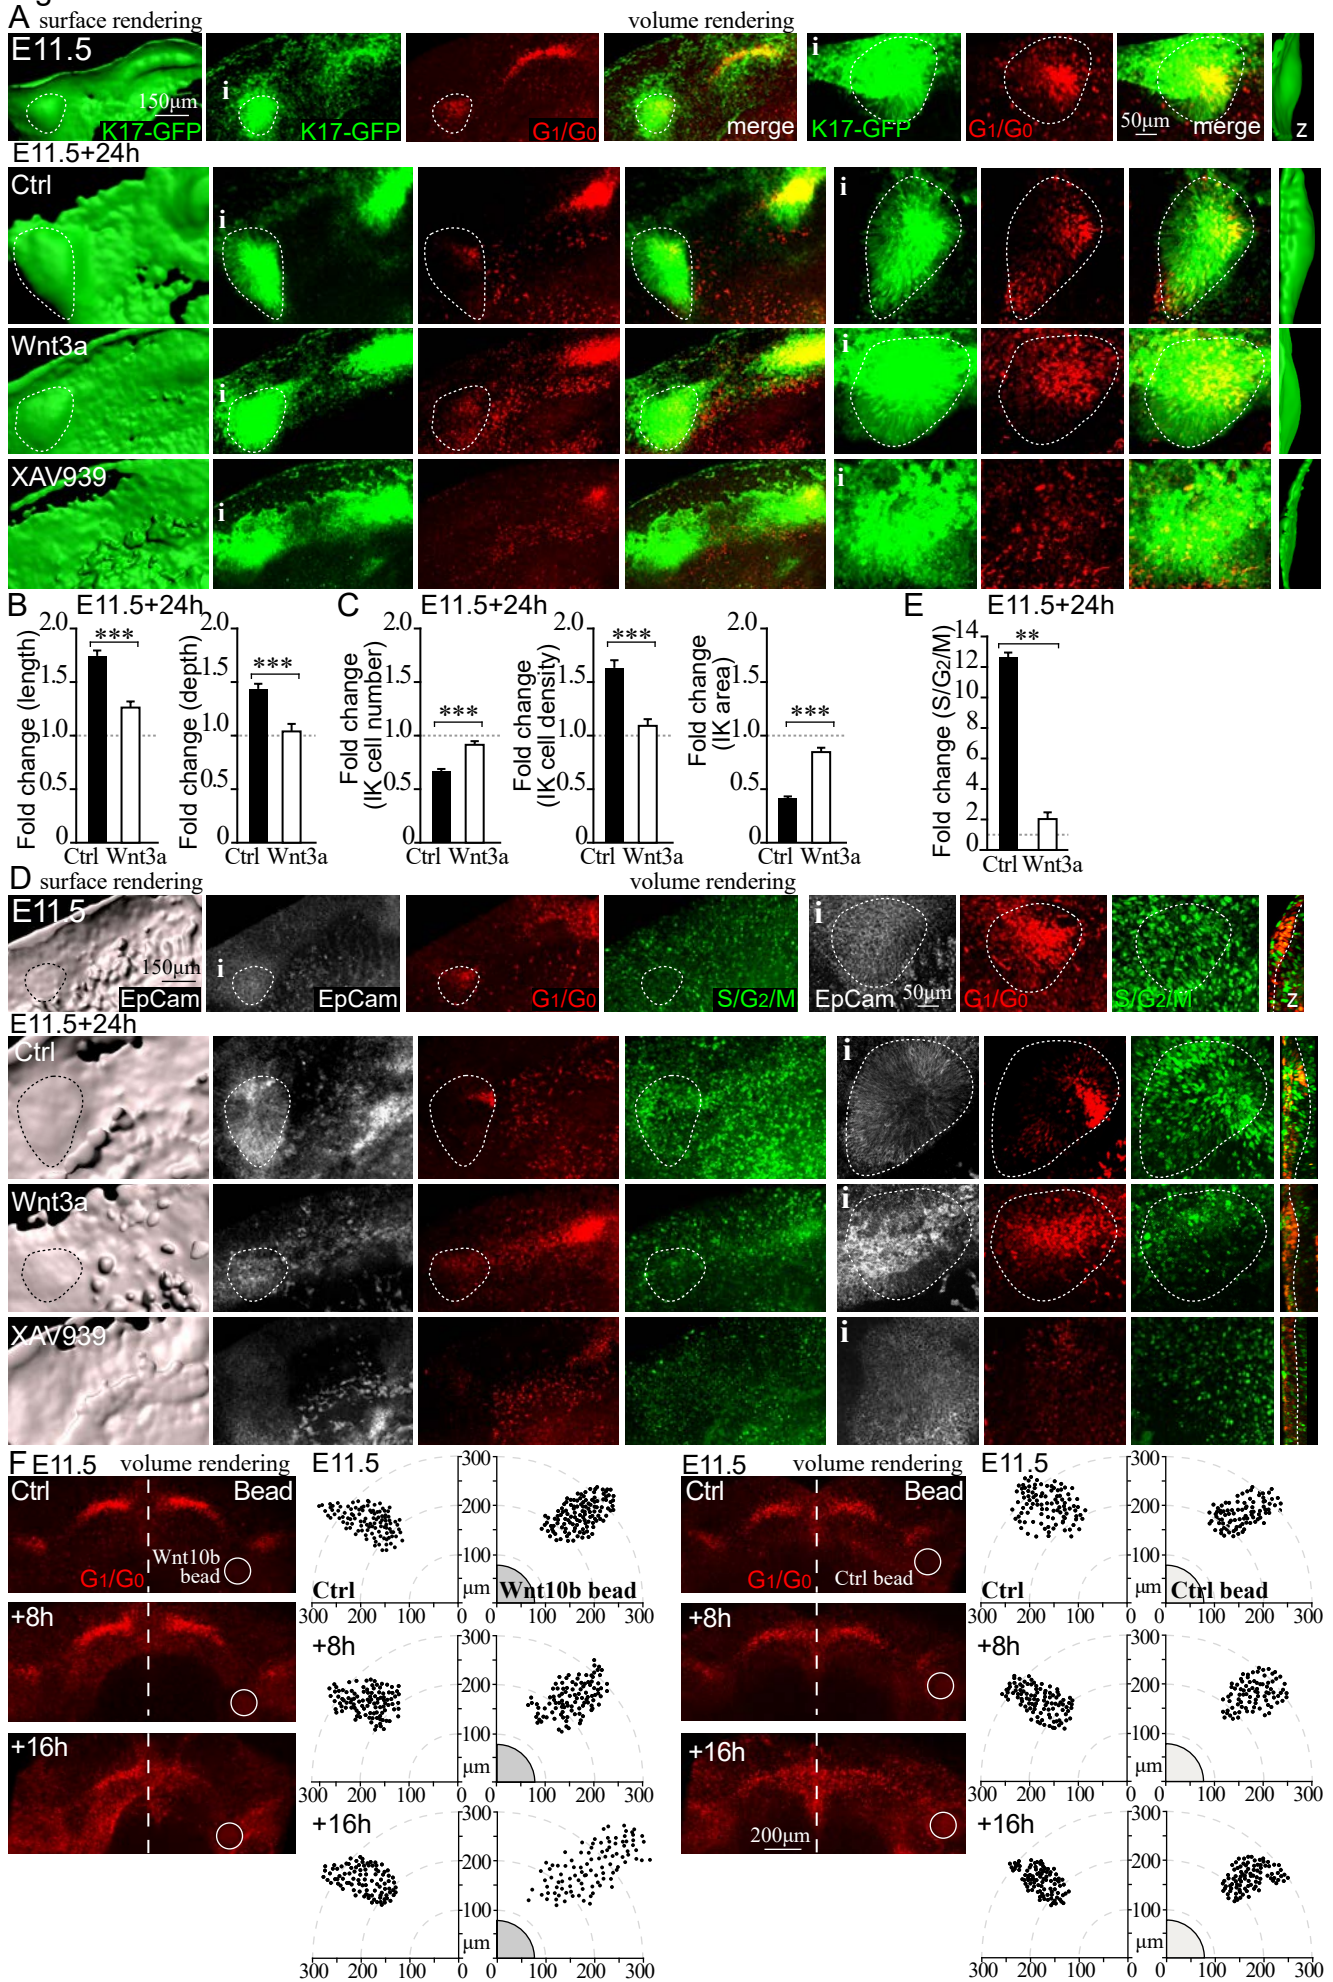

Supplemental Figure S1. (related to Figure 1)

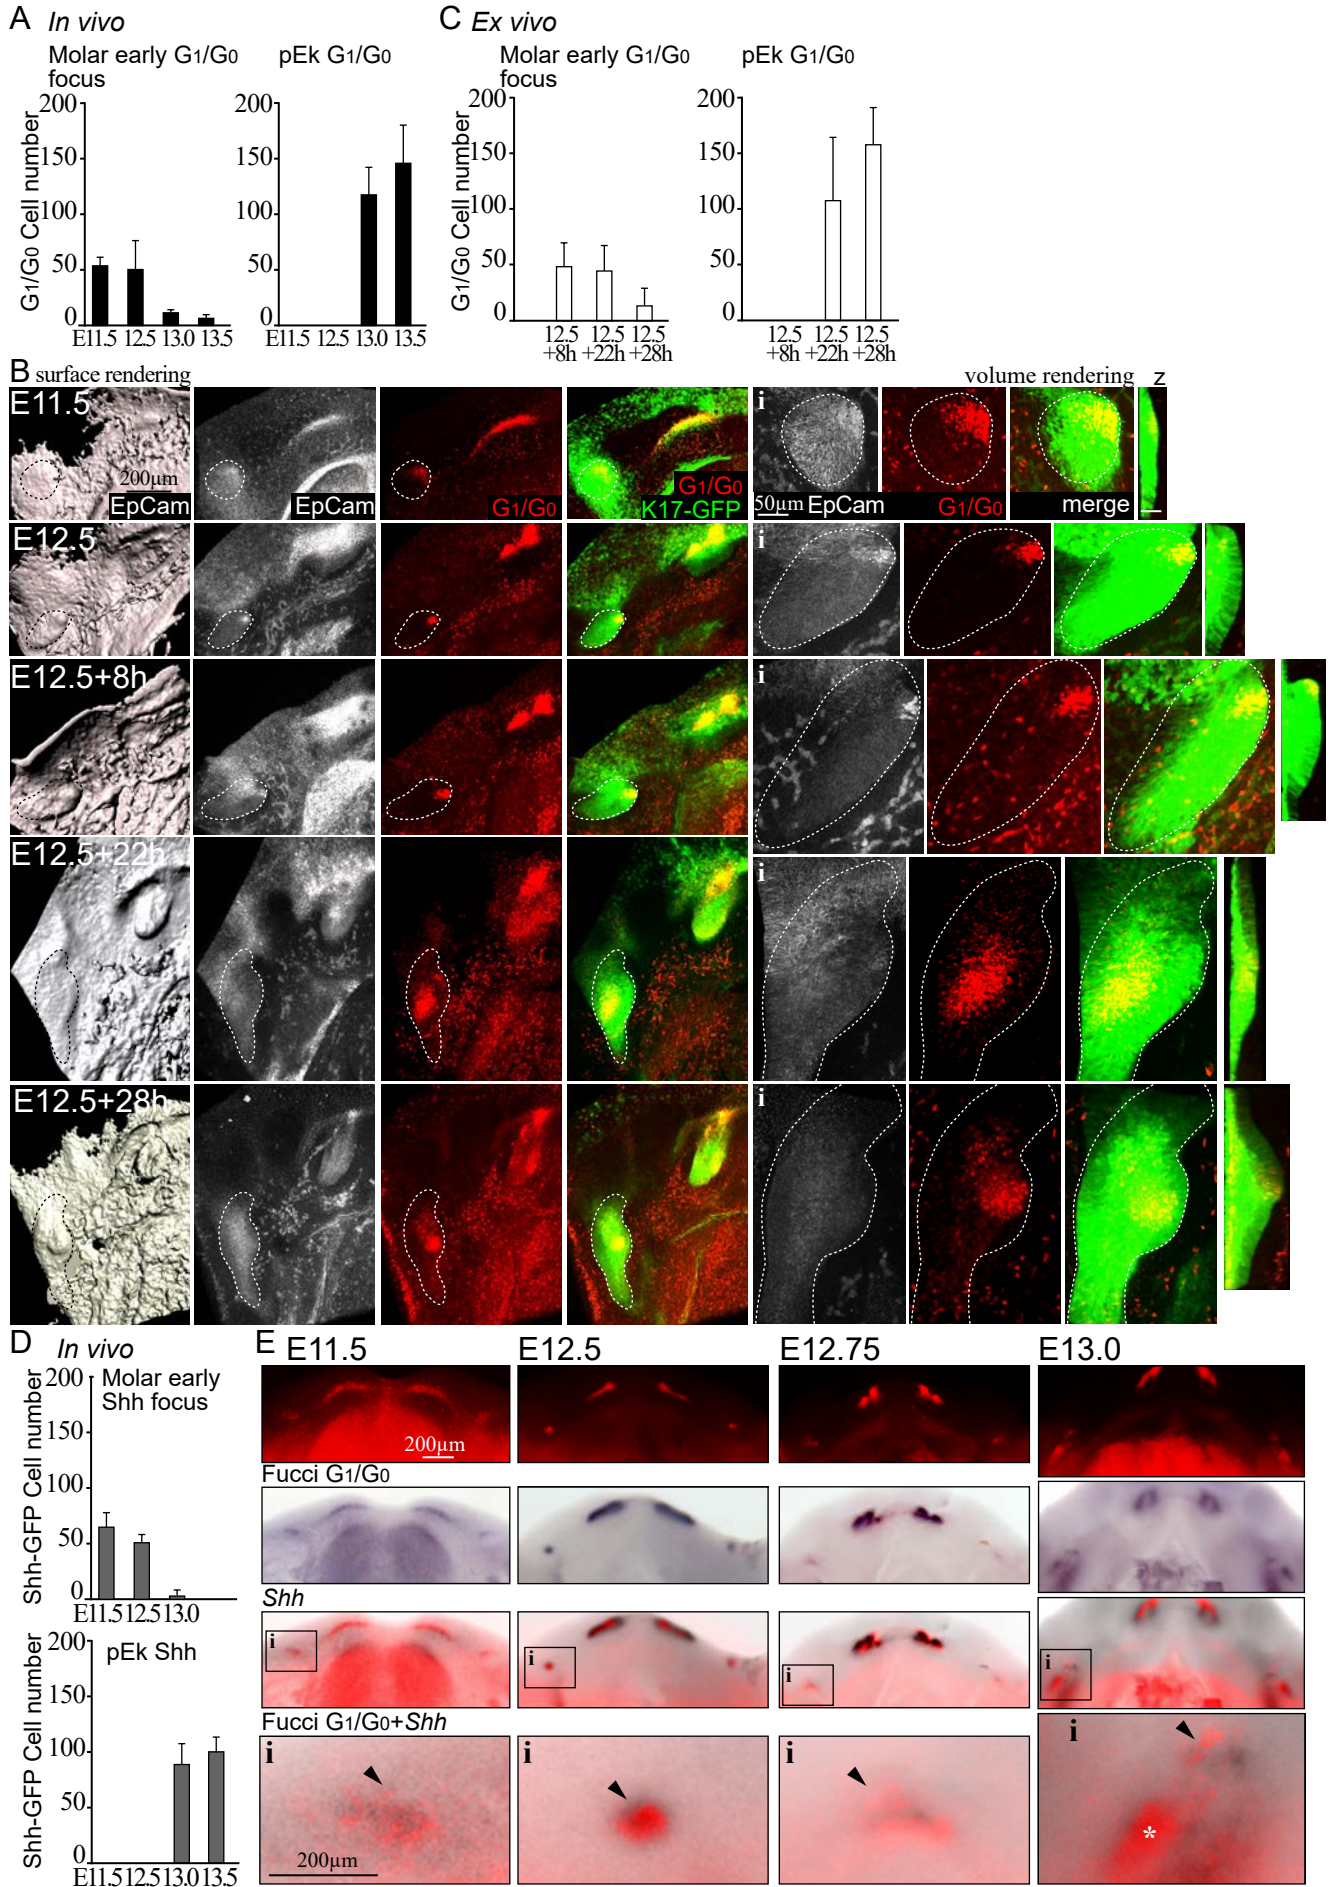



Supplemental Figure S2. (related to Figure 2.)

A E12.5 - E12.5+16h

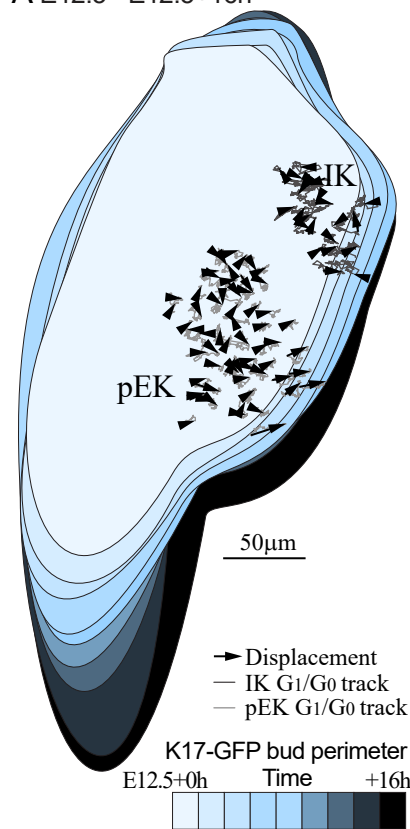

B *In vivo*

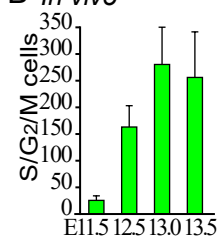

C *In vivo*

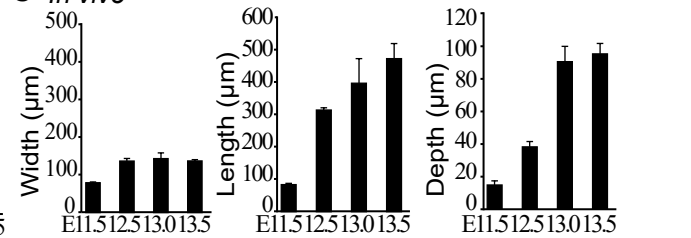

D *Ex vivo*

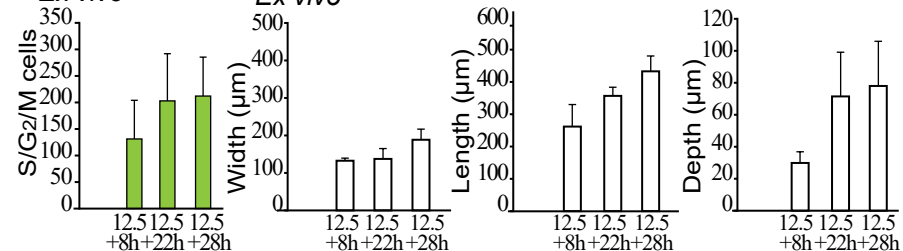

D

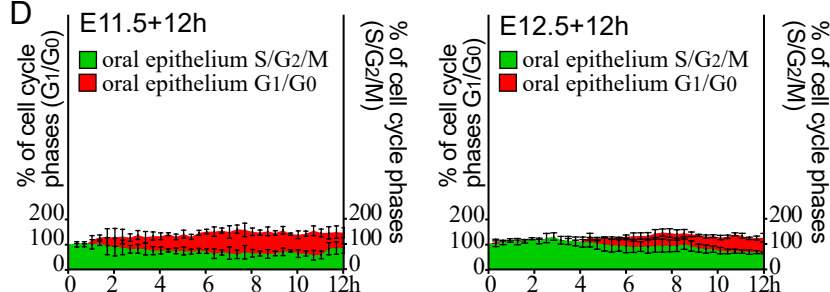

E E11.5 +12h

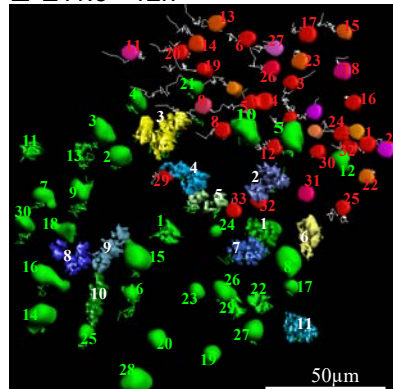

IK G1/G0 Cell (#)

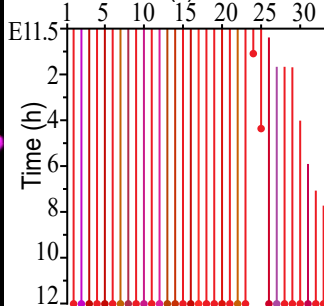

S/G2/M Cell (#)

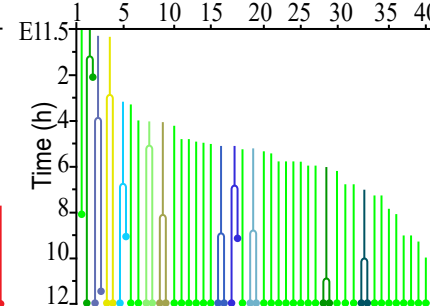

F E12.0 +12h

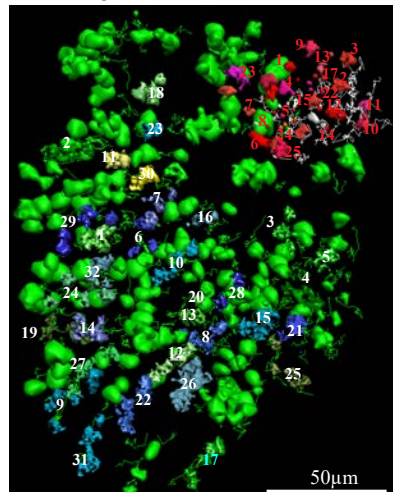

IK G1/G0 Cell (#)

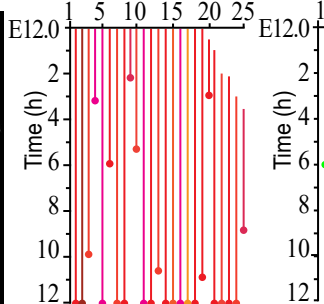

S/G2/M Cell (#)

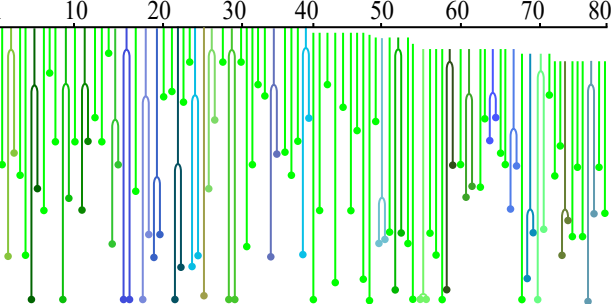

E12.0

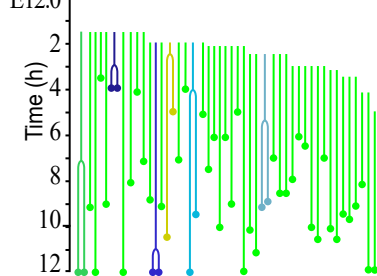

Supplemental Figure S3. (related to Figure 2.)

A E11.5

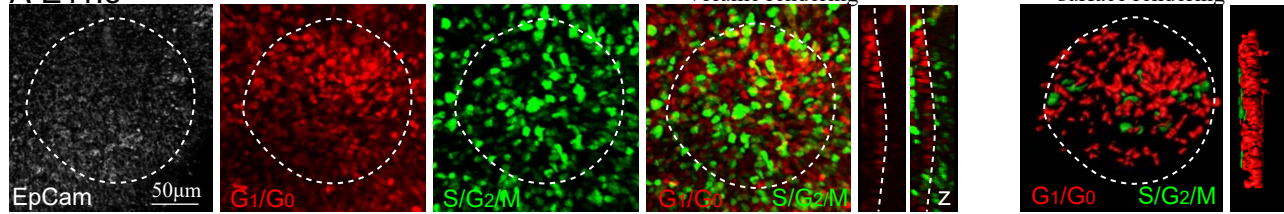

E11.5+24h

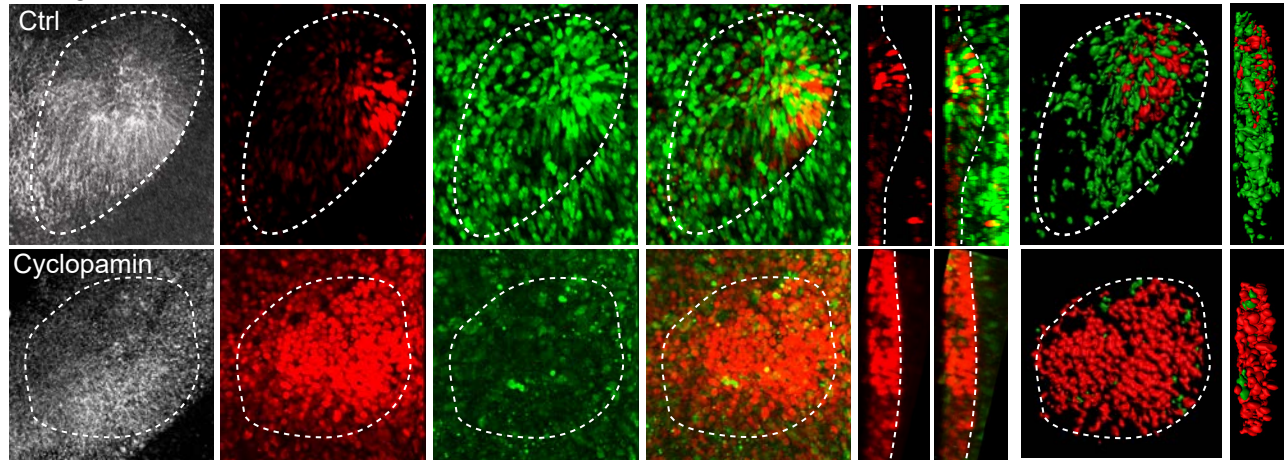

B E11.5

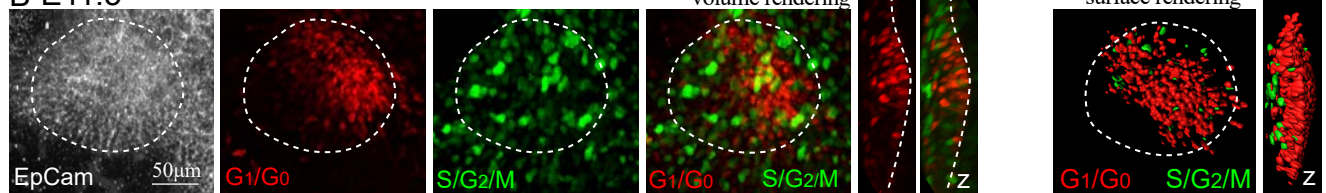

E11.5+24h

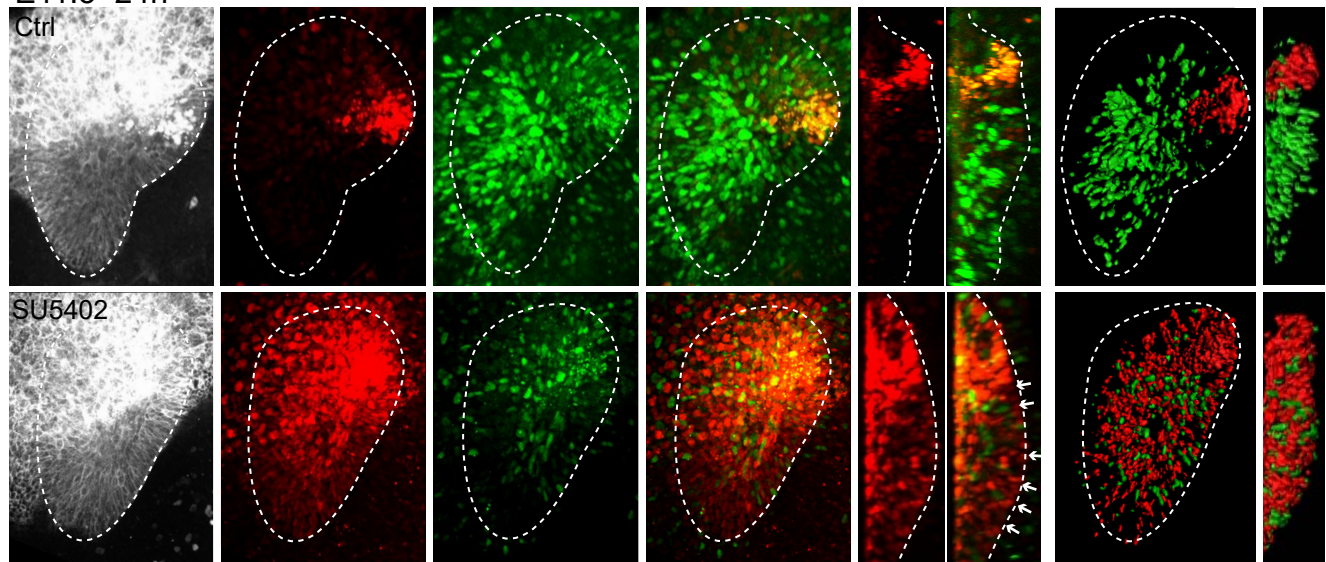

C E11.5+24h

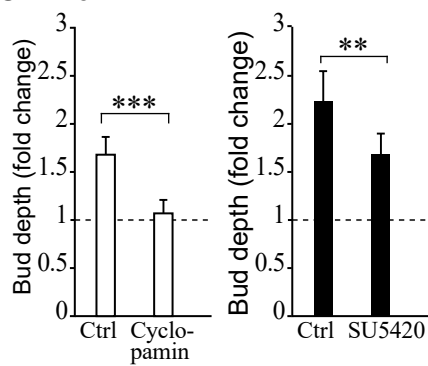

D E11.5+24h

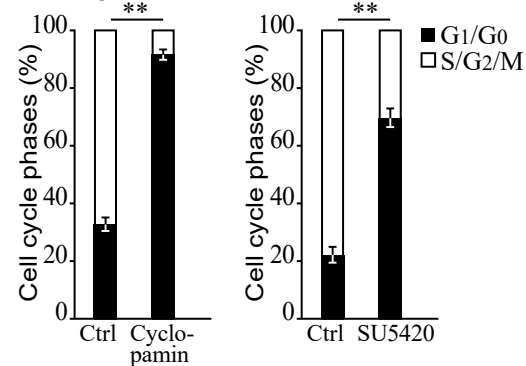

Supplemental Figure S4. (related to Figure 3.)

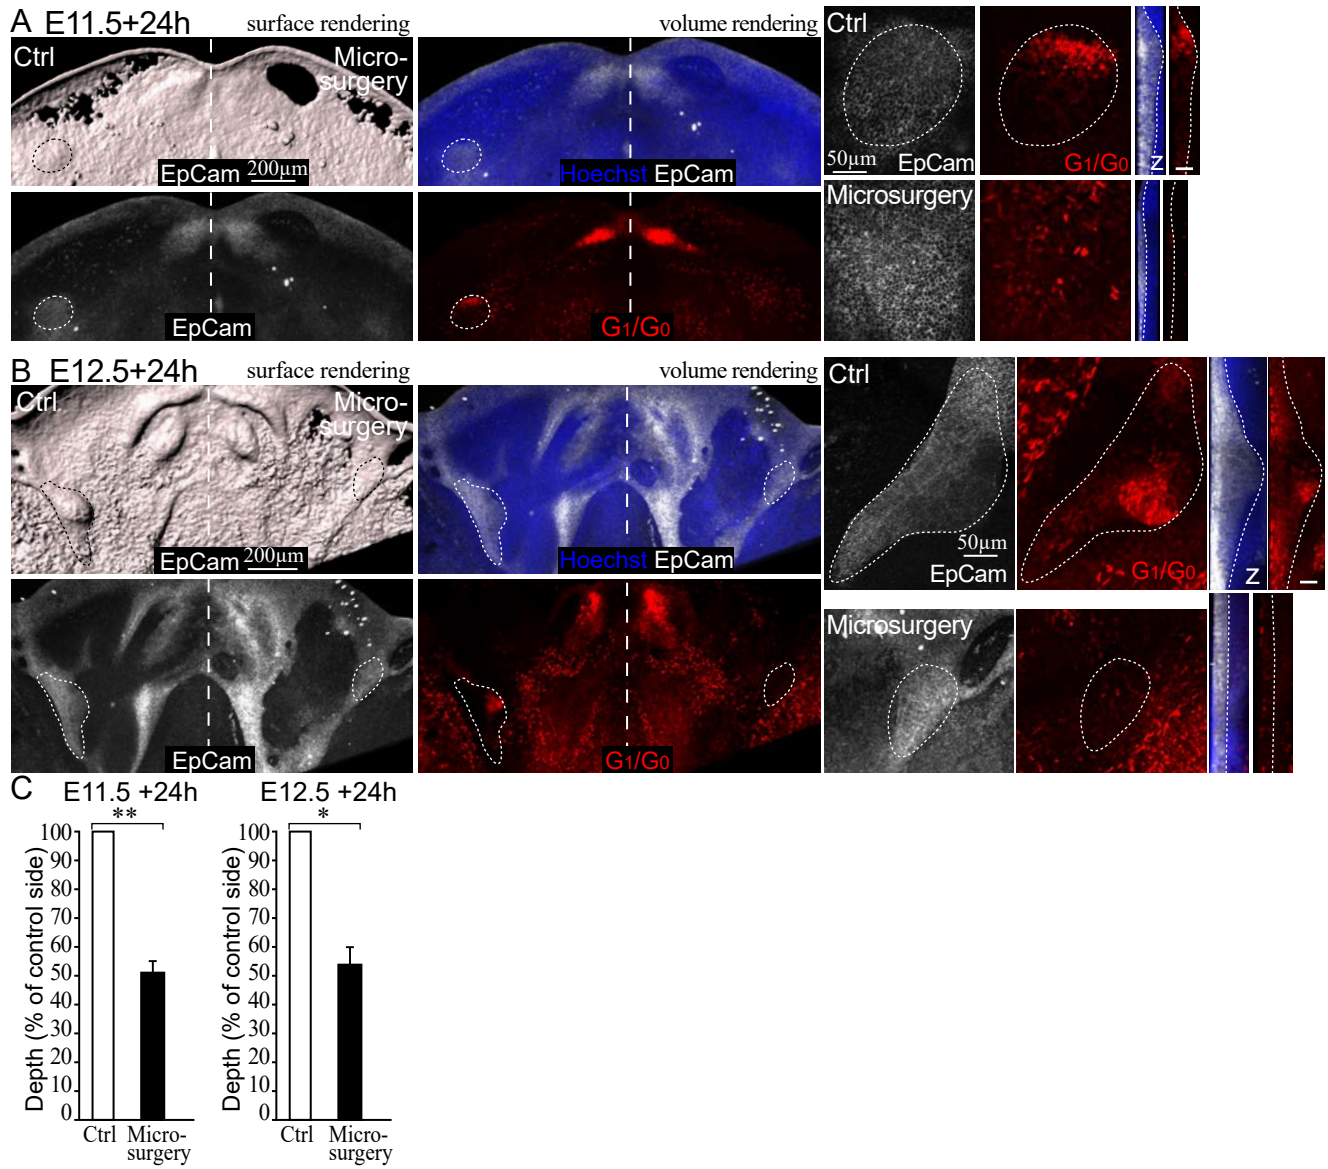

Supplementary Figure S5. (related to Figure 6.)

A Volume rendering

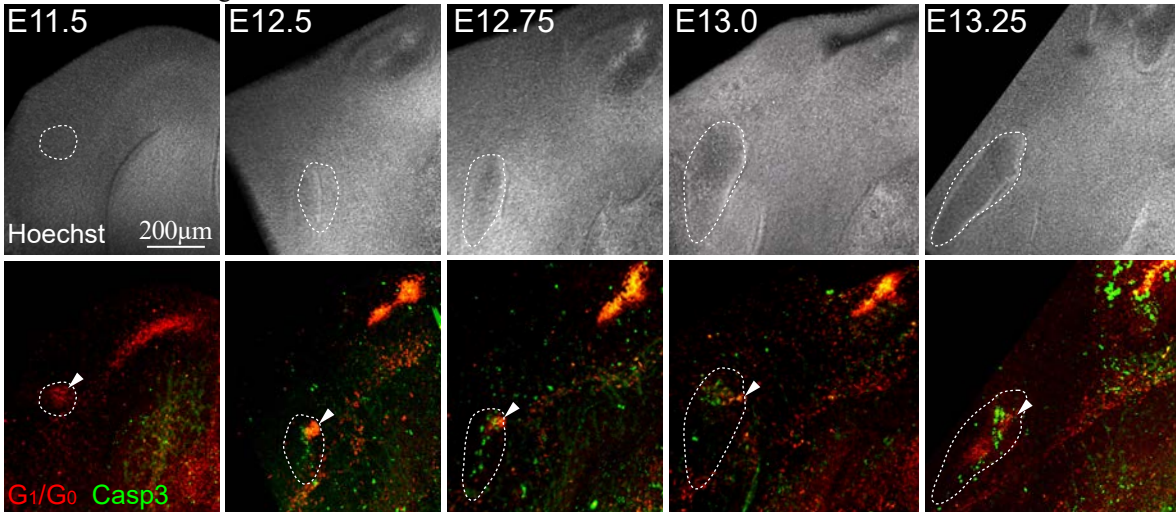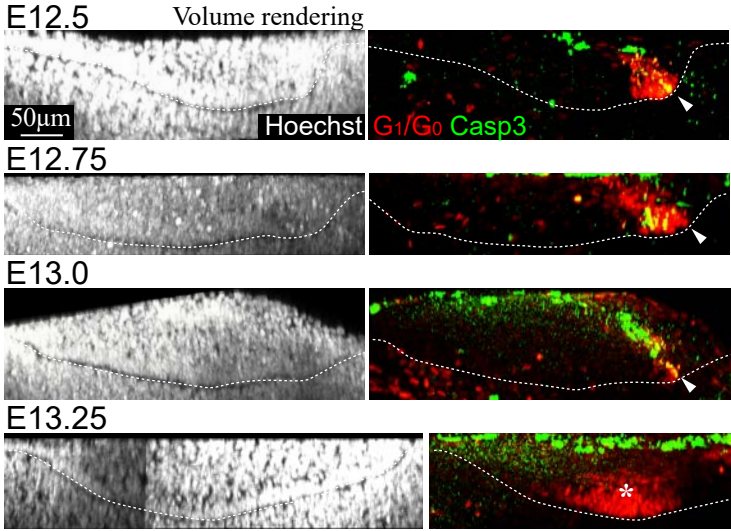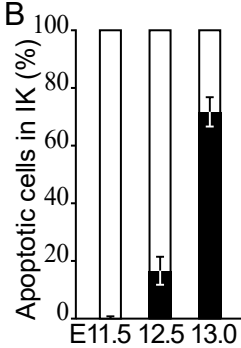

Supplemental Figure S6. (related to Figure 7.)

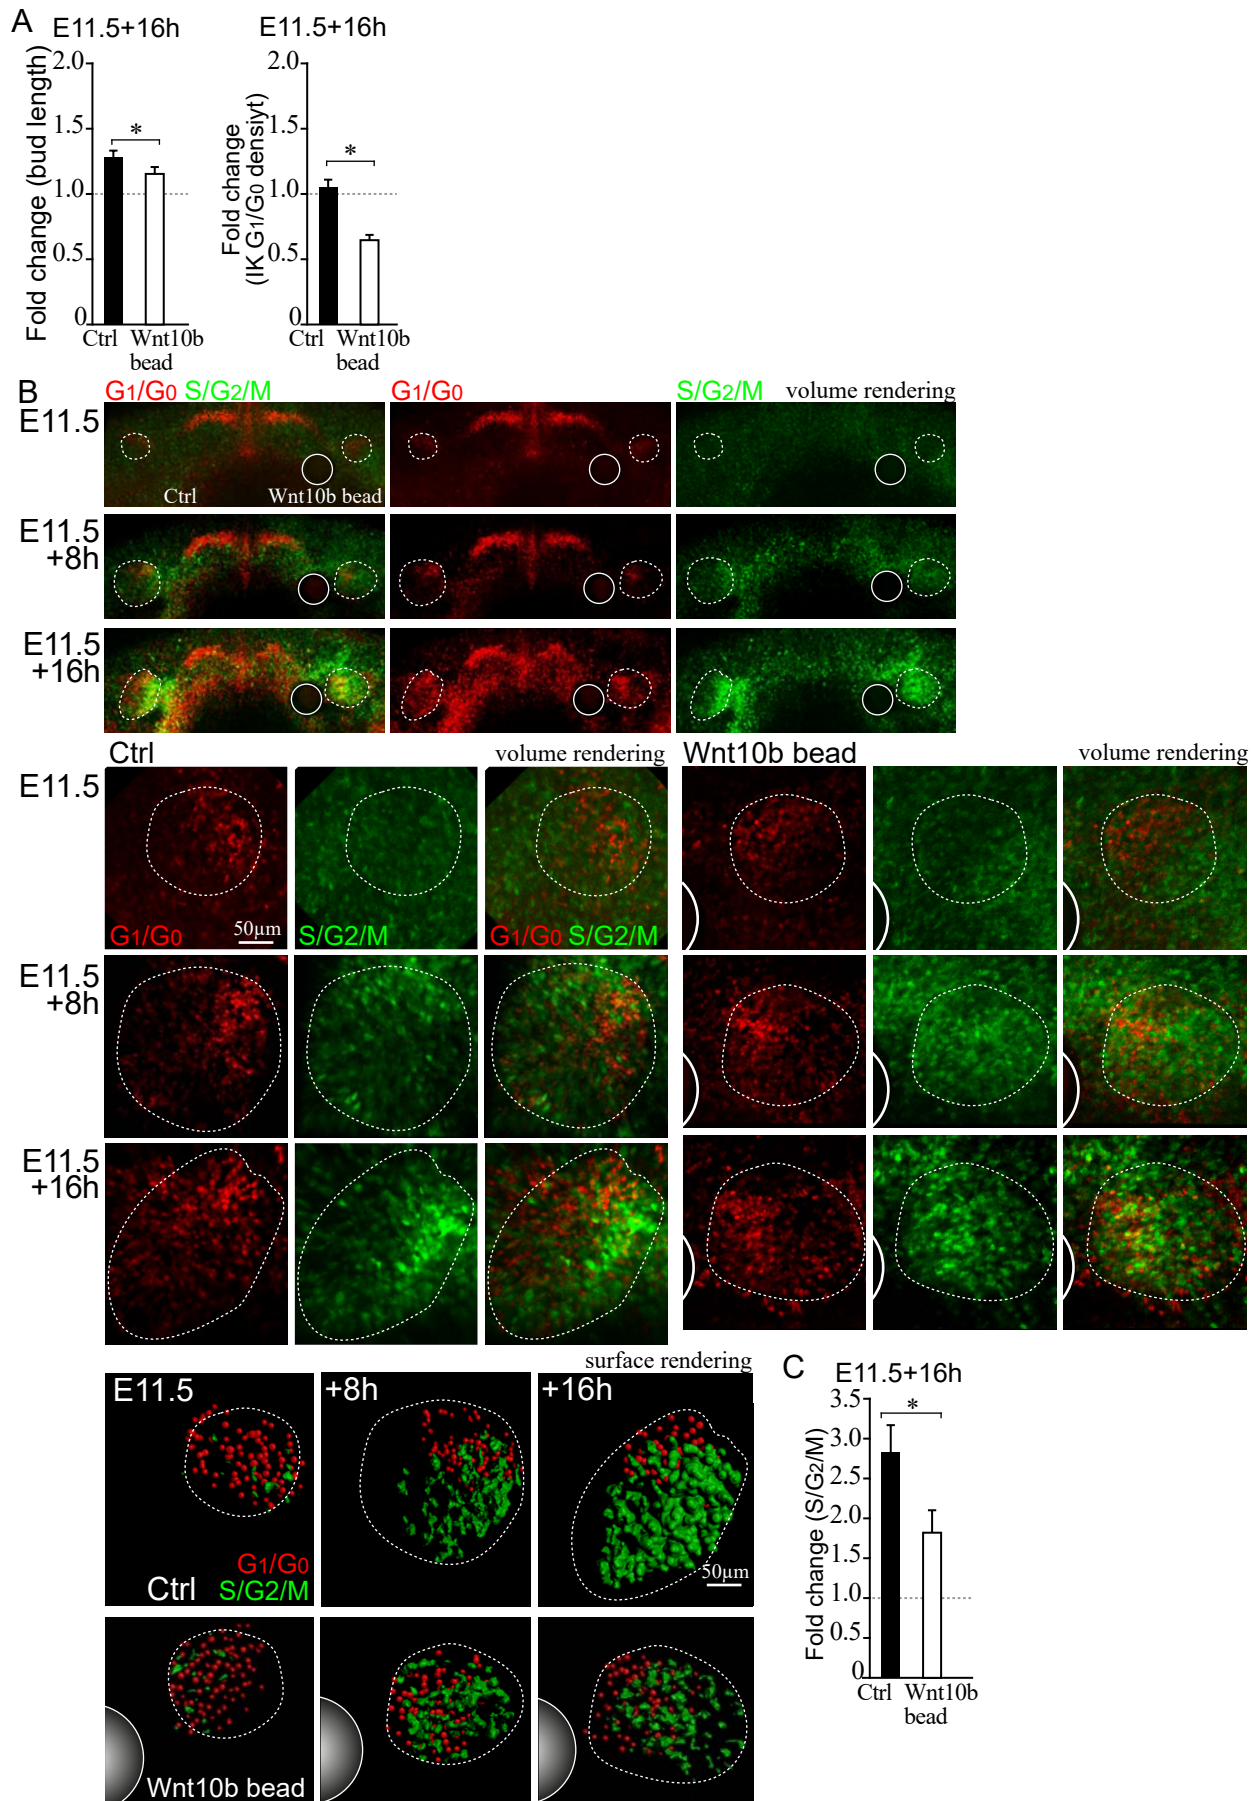

Source: https://www.biorxiv.org/content/10.1101/2020.04.09.033589v1.full.pdf
